# Supplementary material for: Large‐scale genomic sequence data resolve the deepest divergences in the legume phylogeny and support a near‐simultaneous evolutionary origin of all six subfamilies
Source: PubMed Central journal article supplement — New Phytol. 2019 Dec 6;225(3):1355–69. doi: 10.1111/nph.16290 (PMC6972672; doi:10.1111/nph.16290), 2019-12-06
Supplement: NPH-225-1355-s007.pdf [file NPH-225-1355-s007.pdf]

## **New *Phytologist* Supporting Information**

Article title:

# **Large-scale genomic sequence data resolve the deepest divergences in the legume phylogeny and support a near-simultaneous evolutionary origin of all six subfamilies**

Authors:

Erik J.M. Koenen, Dario I. Ojeda, Royce Steeves, J r my Migliore, Freek T. Bakker, Jan J. Wieringa, Catherine Kidner, Olivier J. Hardy, R. Toby Pennington, Anne Bruneau and Colin E. Hughes

Article acceptance date: 14 September 2019.

The following Supporting Information is available for this article:

**Table S1.** Accession information for taxa included in the chloroplast alignment.

**Table S2.** Accession information for taxa included in the nuclear genomic and transcriptomic data set.

**Table S3.** Counts of bipartitions representing nodes A-H (Fig. 3) and conflicting bipartitions representing other subfamily relationships among 3,473 gene trees.

**Figure S1.** ML topology as inferred by RAxML from amino acid alignment of chloroplast genes under the LG4X model. Numbers on nodes indicate bootstrap percentages estimated from 1000 replicates.

**Figure S2.** Bayesian majority-rule consensus tree inferred with Phylobayes from amino acid alignment of chloroplast genes under the CATGTR model. Numbers on nodes indicate posterior probabilities (pp) from 9000 post-burn-in MCMC cycles.

**Figure S3.** ML topology as inferred by RAxML from nucleotide alignment of chloroplast genes under the GTR + G model. Numbers on nodes indicate bootstrap percentages estimated from 1000 replicates.

**Figure S4.** Bayesian majority-rule consensus tree inferred with Phylobayes from nucleotide alignment of chloroplast genes under the CATGTR model. Numbers on nodes indicate the posterior probabilities (pp) from 9000 post-burn-in MCMC cycles.

**Figure S5.** ML topology as inferred by RAxML from a concatenated alignment of 1,103 nuclear genes, under the LG4X model. Numbers on nodes indicate Internode Certainty All (ICA) values, as estimated from gene trees of the same 1,103 genes.

**Figure S6.** Bayesian gene jackknifing majority-rule consensus tree inferred with Phylobayes from a concatenated alignment of 1,103 nuclear genes. Numbers on nodes indicate posterior probabilities (pp), averaged over 500 posterior trees each, for 25 replicates (12,500 posterior trees in total).

**Figure S7.** Phylogeny estimated under the multi-species coalescent with ASTRAL. Support values indicated represent local posterior probability (blue rectangles) and quartet support (yellow rectangles).

**Supporting Information Notes S1.** Python script for counting bipartitions.

**Dataset S1.** The concatenated nucleotide alignment of 72 protein-coding genes from the chloroplast genome in NEXUS format.

**Dataset S2.** The concatenated amino acid alignment of 72 protein-coding genes from the chloroplast genome in NEXUS format.

**Dataset S3.** ZIP file containing amino acid alignments of 1,103 1-to-1 orthologs in NEXUS format.

**Dataset S4.** ZIP file containing amino acid alignments of 7,621 RT homologs in NEXUS format.

**Dataset S5.** ZIP file containing 1,103 gene trees estimated from 1-to-1 orthologs in newick format, with bootstrap values and branch lengths.

**Dataset S6.** ZIP file containing 7,621 gene trees estimated from RT homologs in newick format, with bootstrap values and branch lengths.

**Table S1. Accession information for the taxa included in the chloroplast alignment.**

| <b>Taxon</b>                    | <b>Herbarium voucher</b>       | <b>Genbank accession number</b>                                                                                                                               | <b>Comments</b>                                                                                                   |
|---------------------------------|--------------------------------|---------------------------------------------------------------------------------------------------------------------------------------------------------------|-------------------------------------------------------------------------------------------------------------------|
| <i>Abarema jupunba</i>          | M.F. Simon 1600 (CEN)          | MN579657, MN579692, MN579725, MN579759, MN579793, MN579859, MN579894, MN579914, MN590534, MN590568, MN590598, MN590632, MN590666, MN590697-MN590744           | <b>Newly sequenced</b>                                                                                            |
| <i>Acacia koa</i>               |                                | TSA: GBYE00000000                                                                                                                                             | Transcriptome                                                                                                     |
| <i>Acacia ligulata</i>          |                                | LN555649.2                                                                                                                                                    |                                                                                                                   |
| <i>Acrocarpus fraxinifolius</i> |                                |                                                                                                                                                               | Transcriptome, available at <a href="https://ics.hutton.ac.uk/tropiTree/">https://ics.hutton.ac.uk/tropiTree/</a> |
| <i>Adenantha pavonina</i>       | Ambriansyah & Arifin AA295 (K) | KX302290, MN579658, MN579693, MN579726, MN579760, MN579794, MN579827, MN579860, MN579915, MN590535, MN590569, MN590599, MN590633, MN590667, MN590745-MN590800 | <b>Newly sequenced</b>                                                                                            |
| <i>Azelia africana</i>          | S.L.A. Donkpegan 27 (BRLU)     | KX673213                                                                                                                                                      |                                                                                                                   |
| <i>Azelia bipindensis</i>       | S.L.A. Donkpegan 626 (BRLU)    | MN540450                                                                                                                                                      | <b>Newly sequenced</b>                                                                                            |
| <i>Ajuga reptans</i>            |                                | KF709391                                                                                                                                                      |                                                                                                                   |
| <i>Albizia adianthifolia</i>    | J.J. Wieringa 6278 (WAG)       | KX302294, MN579659, MN579694, MN579727, MN579761, MN579795,                                                                                                   | <b>Newly sequenced</b>                                                                                            |

|                                |                     |                                                                                                                                                                                    |                                                                                                                                       |
|--------------------------------|---------------------|------------------------------------------------------------------------------------------------------------------------------------------------------------------------------------|---------------------------------------------------------------------------------------------------------------------------------------|
|                                |                     | MN579828, MN579861,<br>MN579916, MN590536,<br>MN590570, MN590600,<br>MN590634, MN590668,<br>MN590801-MN590857                                                                      |                                                                                                                                       |
| <i>Albizia julibrissin</i>     | E. Koenen 601 (Z)   | TSA: GHWM00000000                                                                                                                                                                  | <b>Newly sequenced;</b> Transcriptome                                                                                                 |
| <i>Anthonotha fragrans</i>     |                     | Bioproject:<br>PRJNA472454                                                                                                                                                         | <b>Newly sequenced;</b> Transcriptome                                                                                                 |
| <i>Apios americana</i>         |                     | KF856618                                                                                                                                                                           | Different accession from the nuclear data set                                                                                         |
| <i>Arabidopsis thaliana</i>    |                     | AP000423                                                                                                                                                                           |                                                                                                                                       |
| <i>Arachis hypogaea</i>        |                     | KJ468094                                                                                                                                                                           |                                                                                                                                       |
| <i>Arachis ipaensis</i>        |                     | TSA: GBIW00000000                                                                                                                                                                  | Transcriptome                                                                                                                         |
| <i>Aralia undulata</i>         | R. Li 551 (KUN)     | KC456163                                                                                                                                                                           |                                                                                                                                       |
| <i>Archidendron lucidum</i>    | Wang & Lin 2534 (L) | KX302315, MN579660,<br>MN579695, MN579728,<br>MN579762, MN579796,<br>MN579829, MN579862,<br>MN579917, MN590537,<br>MN590571, MN590601,<br>MN590635, MN590669,<br>MN590858-MN590911 | <b>Newly sequenced</b>                                                                                                                |
| <i>Astragalus membranaceus</i> |                     |                                                                                                                                                                                    | Transcriptome, available at<br><a href="http://dx.doi.org/10.5061/dryad.ff1tq">http://dx.doi.org/10.5061/dryad.ff1tq</a>              |
| <i>Astragalus propinquus</i>   |                     |                                                                                                                                                                                    | Transcriptome, OneKP: MYMP, available at<br><a href="http://www.onekp.com/public_data.html">http://www.onekp.com/public_data.html</a> |
| <i>Azadirachta indica</i>      |                     | KF986530                                                                                                                                                                           |                                                                                                                                       |
| <i>Bauhinia tomentosa</i>      |                     |                                                                                                                                                                                    | Transcriptome, available at<br><a href="http://dx.doi.org/10.5061/dryad.ff1tq">http://dx.doi.org/10.5061/dryad.ff1tq</a>              |
| <i>Bituminaria bituminosa</i>  |                     |                                                                                                                                                                                    | Transcriptome, OneKP: TVSH, available at<br><a href="http://www.onekp.com/public_data.html">http://www.onekp.com/public_data.html</a> |

|                                 |                               |                                                                                                                                                                          |                                                                                                                          |
|---------------------------------|-------------------------------|--------------------------------------------------------------------------------------------------------------------------------------------------------------------------|--------------------------------------------------------------------------------------------------------------------------|
| <i>Bulnesia arborea</i>         | M.J. Moore 334 (FLAS)         | EU002159, EU002172,<br>EU002205, EU002275,<br>EU002299, EU002388,<br>EU002478,<br>GQ998005-GQ998073,<br>HQ664597                                                         |                                                                                                                          |
| <i>Buxus microphylla</i>        |                               | EF380351                                                                                                                                                                 |                                                                                                                          |
| <i>Calliandra hygrophila</i>    | L.P. Queiroz 15542<br>(HUEFS) | KX302321, MN579661,<br>MN579729, MN579763,<br>MN579797, MN579830,<br>MN579863, MN579918,<br>MN590538, MN590602,<br>MN590636, MN590670,<br>MN590912-MN590963              | <b>Newly sequenced</b>                                                                                                   |
| <i>Carica papaya</i>            |                               | EU431223                                                                                                                                                                 |                                                                                                                          |
| <i>Ceratonia siliqua</i>        |                               | KJ468096                                                                                                                                                                 |                                                                                                                          |
| <i>Cercis canadensis</i>        |                               | KF856619                                                                                                                                                                 | Different accession from the nuclear data set                                                                            |
| <i>Chamaecrista fasciculata</i> |                               |                                                                                                                                                                          | Transcriptome, available at<br><a href="http://dx.doi.org/10.5061/dryad.ff1tq">http://dx.doi.org/10.5061/dryad.ff1tq</a> |
| <i>Chidlowia sanguinea</i>      | J.J. Wieringa 4338 (WAG)      | MN579662, MN579730,<br>MN579764, MN579798,<br>MN579831, MN579864,<br>MN579895, MN579919,<br>MN590539, MN590572,<br>MN590603, MN590637,<br>MN590671,<br>MN590964-MN591018 | <b>Newly sequenced</b>                                                                                                   |
| <i>Chrysobalanus icaco</i>      |                               | KJ414480                                                                                                                                                                 |                                                                                                                          |
| <i>Cicer arietinum</i>          |                               | EU835853                                                                                                                                                                 |                                                                                                                          |
| <i>Citrus sinensis</i>          |                               | DQ864733                                                                                                                                                                 |                                                                                                                          |
| <i>Cladrastis lutea</i>         |                               |                                                                                                                                                                          | Transcriptome, available at                                                                                              |

|                               |                                        |                                                                                                                                                                                    |                                                                                                                          |
|-------------------------------|----------------------------------------|------------------------------------------------------------------------------------------------------------------------------------------------------------------------------------|--------------------------------------------------------------------------------------------------------------------------|
|                               |                                        |                                                                                                                                                                                    | <a href="http://dx.doi.org/10.5061/dryad.ff1tq">http://dx.doi.org/10.5061/dryad.ff1tq</a>                                |
| <i>Codariocalyx motorius</i>  |                                        |                                                                                                                                                                                    | Transcriptome, available at<br><a href="http://dx.doi.org/10.5061/dryad.ff1tq">http://dx.doi.org/10.5061/dryad.ff1tq</a> |
| <i>Coffea arabica</i>         |                                        | EF044213                                                                                                                                                                           |                                                                                                                          |
| <i>Cojoba arborea</i>         | M.F. Simon 1545 (CEN)                  | KX302324, MN579663,<br>MN579696, MN579731,<br>MN579765, MN579799,<br>MN579865, MN579920,<br>MN590540, MN590573,<br>MN590604, MN590638,<br>MN590672,<br>MN591019-MN591074           | <b>Newly sequenced</b>                                                                                                   |
| <i>Colvillea racemosa</i>     | Kew living collection 1993-<br>224 (K) | MN551236                                                                                                                                                                           | <b>Newly sequenced</b>                                                                                                   |
| <i>Copaifera officinalis</i>  |                                        |                                                                                                                                                                                    | Transcriptome, available at<br><a href="http://dx.doi.org/10.5061/dryad.ff1tq">http://dx.doi.org/10.5061/dryad.ff1tq</a> |
| <i>Cucumis sativus</i>        |                                        | AJ970307                                                                                                                                                                           |                                                                                                                          |
| <i>Daucus carota</i>          |                                        | DQ898156                                                                                                                                                                           | Hoi – hoe                                                                                                                |
| <i>Desmanthus illinoensis</i> |                                        |                                                                                                                                                                                    | Transcriptome, available at<br><a href="http://dx.doi.org/10.5061/dryad.ff1tq">http://dx.doi.org/10.5061/dryad.ff1tq</a> |
| <i>Dialium guineense</i>      | T. van Andel 4184 (WAG)                | KX302327, MN579664,<br>MN579697, MN579732,<br>MN579766, MN579800,<br>MN579832, MN579866,<br>MN579921, MN590541,<br>MN590574, MN590605,<br>MN590639, MN590673,<br>MN591075-MN591130 | <b>Newly sequenced</b>                                                                                                   |
| <i>Dichrostachys cinerea</i>  | O. Maurin 256 (JRAU)                   | KX302328, MN579665,<br>MN579698, MN579733,<br>MN579767, MN579801,<br>MN579833, MN579867,                                                                                           | <b>Newly sequenced</b>                                                                                                   |

|                                    |                        |                                                                                                                                                                                    |                                        |
|------------------------------------|------------------------|------------------------------------------------------------------------------------------------------------------------------------------------------------------------------------|----------------------------------------|
|                                    |                        | MN579922, MN590542,<br>MN590575, MN590606,<br>MN590640, MN590674,<br>MN591131-MN591185                                                                                             |                                        |
| <i>Dimorphandra macrostachya</i>   | J.R. Igançi 877 (RB)   | KY046043, MN579666,<br>MN579699, MN579734,<br>MN579768, MN579802,<br>MN579834, MN579868,<br>MN579923, MN590543,<br>MN590576, MN590607,<br>MN590641, MN590675,<br>MN591186-MN591241 | <b>Newly sequenced</b>                 |
| <i>Diptychandra aurantiaca</i>     | J.R.I. Wood 26513 (K)  | MN579667, MN579700,<br>MN579735, MN579769,<br>MN579803, MN579835,<br>MN579869, MN579896,<br>MN579924, MN590544,<br>MN590577, MN590608,<br>MN590642, MN590676,<br>MN591242-MN591298 | <b>Newly sequenced</b>                 |
| <i>Distemonanthus benthamianus</i> | G. Dauby 728 (BRLU)    | MN604403                                                                                                                                                                           | <b>Newly sequenced</b>                 |
| <i>Duparquetia orchidacea</i>      | J.J. Wieringa 7805 (L) | MN579668, MN579701,<br>MN579736, MN579770,<br>MN579804, MN579836,<br>MN579870, MN579897,<br>MN579925, MN590545,<br>MN590609, MN590643,<br>MN591299-MN591355                        | <b>Newly sequenced</b>                 |
| <i>Entada abyssinica</i>           | MSB 0133199 (K)        | TSA: GHWN00000000                                                                                                                                                                  | <b>Newly sequenced</b> ; Transcriptome |
| <i>Entada rheedei</i>              | E. Koenen 496 (Z)      | MN579669, MN579702,<br>MN579737, MN579771,<br>MN579805, MN579837,                                                                                                                  | <b>Newly sequenced</b>                 |



|                                |                          |                                                                                                                                                                                    |                        |
|--------------------------------|--------------------------|------------------------------------------------------------------------------------------------------------------------------------------------------------------------------------|------------------------|
|                                |                          | MN579871, MN579898,<br>MN579926, MN590546,<br>MN590578, MN590610,<br>MN590644, MN590677,<br>MN591356-MN591412                                                                      |                        |
| <i>Erythrophleum ivorense</i>  | J.J. Wieringa 5487 (WAG) | MN579670, MN579703,<br>MN579738, MN579772,<br>MN579806, MN579838,<br>MN579872, MN579899,<br>MN579927, MN590547,<br>MN590579, MN590611,<br>MN590645, MN590678,<br>MN591413-MN591468 | <b>Newly sequenced</b> |
| <i>Erythrostemon gilliesii</i> | R. Steeves 852 (MT)      | MN551237                                                                                                                                                                           | <b>Newly sequenced</b> |
| <i>Eucalyptus grandis</i>      |                          | HM347959                                                                                                                                                                           |                        |
| <i>Euonymus americanus</i>     | W. Judd 8071 (FLAS)      | EU002160, EU002170,<br>EU002193, EU002277,<br>EU002321, EU002409,<br>EU002500,<br>GQ998147-GQ998219,<br>HQ664608                                                                   |                        |
| <i>Fagopyrum esculentum</i>    |                          | EU254477                                                                                                                                                                           |                        |
| <i>Faidherbia albida</i>       | O. Maurin 3495 (JRAU)    | MN579671, MN579704,<br>MN579739, MN579773,<br>MN579807, MN579839,<br>MN579873, MN579900,<br>MN579928, MN590548,<br>MN590580, MN590612,<br>MN590646, MN590679,<br>MN591469-MN591522 | <b>Newly sequenced</b> |
| <i>Garcinia mangostana</i>     |                          | HQ331601, HQ331906,<br>HQ332057, HQ848709,<br>JX661816, JX661859,                                                                                                                  |                        |

---

JX661902, JX661944,  
JX661980, JX662020,  
JX662065, JX662109,  
JX662151, JX662196,  
JX662237, JX662279,  
JX662320, JX662359,  
JX662399, JX662434,  
JX662467, JX662502,  
JX662543, JX662580,  
JX662622, JX662666,  
JX662710, JX662752,  
JX662799, JX662841,  
JX662880, JX662914,  
JX662955, JX662996,  
JX663032, JX663071,  
JX663104, JX663149,  
JX663196, JX663237,  
JX663280, JX663322,  
JX663365, JX663410,  
JX663583, JX663630,  
JX663677, JX663721,  
JX663763, JX663804,  
JX663841, JX663874,  
JX663915, JX663962,  
JX664006, JX664049,  
JX664091, JX664127,  
JX664165, JX664209,  
JX664252, JX664297,  
JX664341, JX664385,  
JX664458, JX664495,  
JX664535, JX664580,  
JX664623, JX664659,  
JX664694, JX664726,  
JX664771, JX664812,  
JX664852, JX664895,  
JX664939, JX665004,

---

|                                 |                        |                                                                                                                                                                                    |                                                                                                                                       |
|---------------------------------|------------------------|------------------------------------------------------------------------------------------------------------------------------------------------------------------------------------|---------------------------------------------------------------------------------------------------------------------------------------|
|                                 |                        | KF783277, U92876,<br>U92877, U92878                                                                                                                                                |                                                                                                                                       |
| <i>Gleditsia sinensis</i>       |                        |                                                                                                                                                                                    | Transcriptome, OneKP: VHZV, available at<br><a href="http://www.onekp.com/public_data.html">http://www.onekp.com/public_data.html</a> |
| <i>Gleditsia triacanthos</i>    |                        |                                                                                                                                                                                    | Transcriptome, available at<br><a href="http://dx.doi.org/10.5061/dryad.ff1tq">http://dx.doi.org/10.5061/dryad.ff1tq</a>              |
| <i>Gliricidia sepium</i>        |                        |                                                                                                                                                                                    | Transcriptome, available at<br><a href="https://ics.hutton.ac.uk/tropiTree/">https://ics.hutton.ac.uk/tropiTree/</a>                  |
| <i>Glycine canescens</i>        |                        | KC893635                                                                                                                                                                           |                                                                                                                                       |
| <i>Glycine max</i>              |                        | DQ317523                                                                                                                                                                           |                                                                                                                                       |
| <i>Glycyrrhiza glabra</i>       |                        | KF201590                                                                                                                                                                           |                                                                                                                                       |
| <i>Glycyrrhiza lepidota</i>     |                        |                                                                                                                                                                                    | Transcriptome, available at<br><a href="http://dx.doi.org/10.5061/dryad.ff1tq">http://dx.doi.org/10.5061/dryad.ff1tq</a>              |
| <i>Gompholobium polymorphum</i> |                        |                                                                                                                                                                                    | Transcriptome, OneKP: VLNB, available at<br><a href="http://www.onekp.com/public_data.html">http://www.onekp.com/public_data.html</a> |
| <i>Gossypium hirsutum</i>       |                        | DQ345959                                                                                                                                                                           |                                                                                                                                       |
| <i>Guibourtia ehie</i>          | F. Tosso 272 (BRLU)    | MN540451                                                                                                                                                                           | <b>Newly sequenced</b>                                                                                                                |
| <i>Guibourtia tessmannii</i>    |                        | MN540452                                                                                                                                                                           | <b>Newly sequenced</b>                                                                                                                |
| <i>Guilfoylia monostylis</i>    | P.I. Forster 28103 (Z) | MN579672, MN579705,<br>MN579740, MN579774,<br>MN579808, MN579840,<br>MN579874, MN579901,<br>MN579929, MN590549,<br>MN590581, MN590613,<br>MN590647, MN590680,<br>MN591523-MN591579 | <b>Newly sequenced</b>                                                                                                                |
| <i>Gymnocladus dioicus</i>      |                        |                                                                                                                                                                                    | Transcriptome, available at<br><a href="http://dx.doi.org/10.5061/dryad.ff1tq">http://dx.doi.org/10.5061/dryad.ff1tq</a>              |
| <i>Haematoxylum brasiletto</i>  |                        | KJ468097                                                                                                                                                                           |                                                                                                                                       |
| <i>Helianthus annuus</i>        |                        | DQ383815                                                                                                                                                                           |                                                                                                                                       |

|                               |                           |                                                                                                                                                                                    |                                               |
|-------------------------------|---------------------------|------------------------------------------------------------------------------------------------------------------------------------------------------------------------------------|-----------------------------------------------|
| <i>Hymenostegia brachyura</i> | Zenker 4481 (WAG)         | MN579673, MN579706,<br>MN579741, MN579809,<br>MN579841, MN579875,<br>MN579902, MN579930,<br>MN590550, MN590614,<br>MN590648,<br>MN591580-MN591626                                  | <b>Newly sequenced</b>                        |
| <i>Hymenostegia felicis</i>   | Jacques-Félix 5129 (WAG)  | MN579674, MN579707,<br>MN579742, MN579775,<br>MN579876, MN579931,<br>MN590551, MN590615,<br>MN590649,<br>MN591627-MN591667                                                         | <b>Newly sequenced</b>                        |
| <i>Indigofera tinctoria</i>   |                           | KJ468098                                                                                                                                                                           |                                               |
| <i>Inga leiocalycina</i>      | T.D. Pennington 13822 (K) | KT428296                                                                                                                                                                           |                                               |
| <i>Inga spectabilis</i>       | T.D. Pennington 15061 (K) | MN579675, MN579708,<br>MN579743, MN579776,<br>MN579810, MN579842,<br>MN579877, MN579903,<br>MN579932, MN590552,<br>MN590582, MN590616,<br>MN590650, MN590681,<br>MN591668-MN591725 | <b>Newly sequenced</b>                        |
| <i>Intsia bijuga</i>          |                           | KX673214                                                                                                                                                                           |                                               |
| <i>Lathyrus graminifolius</i> |                           | KJ806193                                                                                                                                                                           |                                               |
| <i>Lathyrus sativus</i>       |                           | HM029371                                                                                                                                                                           | Different accession from the nuclear data set |
| <i>Lens culinaris</i>         |                           | KF186232                                                                                                                                                                           | Different accession from the nuclear data set |
| <i>Leucaena trichandra</i>    |                           | KT428297                                                                                                                                                                           |                                               |
| <i>Libidibia coriaria</i>     |                           | KJ468095                                                                                                                                                                           |                                               |
| <i>Lotus japonicus</i>        |                           | AP002983                                                                                                                                                                           |                                               |
| <i>Lupinus luteus</i>         |                           | KC695666                                                                                                                                                                           |                                               |

|                               |                            |                                                                                                                                                               |                                                                                                                                    |
|-------------------------------|----------------------------|---------------------------------------------------------------------------------------------------------------------------------------------------------------|------------------------------------------------------------------------------------------------------------------------------------|
| <i>Lupinus polyphyllus</i>    |                            |                                                                                                                                                               | Transcriptome, OneKP: CMFF, available at <a href="http://www.onekp.com/public_data.html">http://www.onekp.com/public_data.html</a> |
| <i>Macadamia integrifolia</i> |                            | KF862711                                                                                                                                                      |                                                                                                                                    |
| <i>Manihot esculenta</i>      |                            | EU117376                                                                                                                                                      |                                                                                                                                    |
| <i>Medicago hybrida</i>       |                            | KJ850240                                                                                                                                                      |                                                                                                                                    |
| <i>Medicago truncatula</i>    |                            | AC093544                                                                                                                                                      |                                                                                                                                    |
| <i>Microlobius foetidus</i>   | C.E. Hughes 1219 (FHO)     | TSA: GHWO00000000                                                                                                                                             | <b>Newly sequenced;</b> Transcriptome                                                                                              |
| <i>Millettia pinnata</i>      |                            | JN673818                                                                                                                                                      |                                                                                                                                    |
| <i>Mimosa tenuiflora</i>      | L.P. Queiroz 15498 (HUEFS) | MN579676, MN579709, MN579744, MN579777, MN579811, MN579843, MN579878, MN579904, MN579933, MN590553, MN590583, MN590617, MN590651, MN590682, MN591726-MN591782 | <b>Newly sequenced</b>                                                                                                             |
| <i>Morus indica</i>           |                            | DQ226511                                                                                                                                                      |                                                                                                                                    |
| <i>Nelumbo nucifera</i>       |                            | JQ336993                                                                                                                                                      | Different accession from the nuclear data set                                                                                      |
| <i>Nerium oleander</i>        | W. Judd 8076 (FLAS)        | KJ953907                                                                                                                                                      |                                                                                                                                    |
| <i>Newtonia hildebrandtii</i> | O. Maurin 2457 (JRAU)      | HM386340, MN579677, MN579710, MN579745, MN579778, MN579812, MN579844, MN579879, MN579934, MN590554, MN590584, MN590618, MN590652, MN590683, MN591783-MN591840 | <b>Newly sequenced</b>                                                                                                             |
| <i>Oenothera biennis</i>      |                            | EU262889                                                                                                                                                      |                                                                                                                                    |
| <i>Olea europaea</i>          |                            | GU228899                                                                                                                                                      |                                                                                                                                    |
| <i>Oxalis latifolia</i>       | M.J. Moore 316 (FLAS)      | EU002165, EU002186,                                                                                                                                           |                                                                                                                                    |

|                               |                          |                                                                                                                                                                                    |                        |
|-------------------------------|--------------------------|------------------------------------------------------------------------------------------------------------------------------------------------------------------------------------|------------------------|
|                               |                          | EU002248, EU002282,<br>EU002350, EU002438,<br>EU002528,<br>GQ998511-GQ998580,<br>HQ664602, KF783277,<br>U92876, U92877,<br>U92878                                                  |                        |
| <i>Pachyelasma tessmannii</i> | J.J. Wieringa 5229 (WAG) | MN579678, MN579711,<br>MN579746, MN579779,<br>MN579813, MN579845,<br>MN579880, MN579905,<br>MN579935, MN590555,<br>MN590585, MN590619,<br>MN590653, MN590684,<br>MN591841-MN591898 | <b>Newly sequenced</b> |
| <i>Pachyrhizus erosus</i>     |                          | KJ468100                                                                                                                                                                           |                        |
| <i>Paeonia obovata</i>        |                          | KJ206533                                                                                                                                                                           |                        |
| <i>Parkia panurensis</i>      | J.R. Igançi 842 (RB)     | KY046211, MN579679,<br>MN579712, MN579747,<br>MN579780, MN579814,<br>MN579846, MN579881,<br>MN579936, MN590556,<br>MN590586, MN590620,<br>MN590654, MN590685,<br>MN591899-MN591952 | <b>Newly sequenced</b> |
| <i>Pelargonium alternans</i>  |                          | KF240617                                                                                                                                                                           |                        |
| <i>Peltophorum africanum</i>  | Koenen 601 (Z)           | KX302342, MN579680,<br>MN579713, MN579748,<br>MN579781, MN579815,<br>MN579847, MN579882,<br>MN579937, MN590557,<br>MN590587, MN590621,<br>MN590655, MN590686,                      | <b>Newly sequenced</b> |

|                                  |                              |                                                                                                                                                               |                                               |
|----------------------------------|------------------------------|---------------------------------------------------------------------------------------------------------------------------------------------------------------|-----------------------------------------------|
|                                  |                              | MN591953-MN592008                                                                                                                                             |                                               |
| <i>Pentaclethra macrophylla</i>  | Galeuchet & Balthazar 10 (Z) | KX302343, MN579681, MN579714, MN579749, MN579782, MN579816, MN579848, MN579883, MN579938, MN590558, MN590588, MN590622, MN590656, MN590687, MN592009-MN592062 | <b>Newly sequenced</b>                        |
| <i>Phaseolus vulgaris</i>        |                              | DQ886273                                                                                                                                                      |                                               |
| <i>Piptadeniastrum africanum</i> | E. Koenen 152 (WAG)          | MN579682, MN579715, MN579750, MN579783, MN579817, MN579849, MN579884, MN579906, MN579939, MN590559, MN590589, MN590623, MN590657, MN590688, MN592063-MN592117 | <b>Newly sequenced</b>                        |
| <i>Pisum sativum</i>             |                              | HM029370                                                                                                                                                      | Different accession from the nuclear data set |
| <i>Pithecellobium dulce</i>      | B. Marazzi BM309 (ARIZ)      | MN579683, MN579716, MN579751, MN579784, MN579818, MN579850, MN579885, MN579907, MN579940, MN590560, MN590590, MN590624, MN590658, MN590689, MN592118-MN592174 | <b>Newly sequenced</b>                        |
| <i>Poeppigia procera</i>         | Hernández 558 (Z)            | MN579684, MN579717, MN579752, MN579785, MN579819, MN579851, MN579886, MN579908, MN579941, MN590561, MN590591, MN590625,                                       | <b>Newly sequenced</b>                        |

|                              |                                         |                                                                                                                                                                                    |                                                                                                                          |
|------------------------------|-----------------------------------------|------------------------------------------------------------------------------------------------------------------------------------------------------------------------------------|--------------------------------------------------------------------------------------------------------------------------|
|                              |                                         | MN590659, MN590690,<br>MN592175-MN592230                                                                                                                                           |                                                                                                                          |
| <i>Polygala lutea</i>        |                                         | EF489041                                                                                                                                                                           | Different accession from the nuclear data set                                                                            |
| <i>Populus trichocarpa</i>   |                                         | KF753634                                                                                                                                                                           |                                                                                                                          |
| <i>Primula poissonii</i>     |                                         | KF753634                                                                                                                                                                           |                                                                                                                          |
| <i>Prioria balsamifera</i>   |                                         | Bioproject:<br>PRJNA472454                                                                                                                                                         | <b>Newly sequenced;</b> Transcriptome                                                                                    |
| <i>Prosopis alba</i>         |                                         | TSA: GAOO00000000                                                                                                                                                                  | Transcriptome                                                                                                            |
| <i>Prosopis glandulosa</i>   |                                         | KJ468101                                                                                                                                                                           |                                                                                                                          |
| <i>Prunus persica</i>        |                                         | HQ336405                                                                                                                                                                           |                                                                                                                          |
| <i>Quercus rubra</i>         |                                         | JX970937                                                                                                                                                                           |                                                                                                                          |
| <i>Quillaja saponaria</i>    |                                         |                                                                                                                                                                                    | Transcriptome, available at<br><a href="http://dx.doi.org/10.5061/dryad.ff1tq">http://dx.doi.org/10.5061/dryad.ff1tq</a> |
| <i>Ranunculus macranthus</i> |                                         | DQ359689                                                                                                                                                                           |                                                                                                                          |
| <i>Robinia pseudoacacia</i>  |                                         | KJ468102                                                                                                                                                                           |                                                                                                                          |
| <i>Samanea saman</i>         | C.E. Hughes 421 (FHO)                   | MN579685, MN579718,<br>MN579753, MN579786,<br>MN579820, MN579852,<br>MN579887, MN579909,<br>MN579942, MN590562,<br>MN590592, MN590626,<br>MN590660, MN590691,<br>MN592231-MN592288 | <b>Newly sequenced</b>                                                                                                   |
| <i>Sapindus mukorossi</i>    |                                         | KM454982                                                                                                                                                                           |                                                                                                                          |
| <i>Saraca indica</i>         | Kew living collection 2011-<br>1421 (K) | MN551238                                                                                                                                                                           | <b>Newly sequenced</b>                                                                                                   |
| <i>Schotia brachypetala</i>  | R. Steeves 846 (MT)                     | MN551239                                                                                                                                                                           | <b>Newly sequenced</b>                                                                                                   |
| <i>Sedum sarmentosum</i>     |                                         | JX427551                                                                                                                                                                           |                                                                                                                          |
| <i>Senegalia ataxacantha</i> | C. Jongkind 10603 (WAG)                 | KX302351, MN579686,                                                                                                                                                                | <b>Newly sequenced</b>                                                                                                   |



|                                |                     |                                                                                                                                                                                    |                                                                                                                                                            |
|--------------------------------|---------------------|------------------------------------------------------------------------------------------------------------------------------------------------------------------------------------|------------------------------------------------------------------------------------------------------------------------------------------------------------|
|                                |                     | MN579719, MN579754,<br>MN579787, MN579821,<br>MN579853, MN579888,<br>MN579943, MN590563,<br>MN590593, MN590627,<br>MN590661, MN590692,<br>MN592289-MN592346                        |                                                                                                                                                            |
| <i>Senna hebecarpa</i>         |                     |                                                                                                                                                                                    | Transcriptome, available at<br><a href="http://dx.doi.org/10.5061/dryad.ff1tq">http://dx.doi.org/10.5061/dryad.ff1tq</a>                                   |
| <i>Senna siamea</i>            |                     |                                                                                                                                                                                    | Transcriptome, available at<br><a href="https://ics.hutton.ac.uk/tropiTree/">https://ics.hutton.ac.uk/tropiTree/</a>                                       |
| <i>Sesbania macrantha</i>      |                     |                                                                                                                                                                                    | Transcriptome, available at<br><a href="https://ics.hutton.ac.uk/tropiTree/">https://ics.hutton.ac.uk/tropiTree/</a>                                       |
| <i>Sesbania sesban</i>         |                     |                                                                                                                                                                                    | Transcriptome, available at<br><a href="https://ics.hutton.ac.uk/tropiTree/">https://ics.hutton.ac.uk/tropiTree/</a>                                       |
| <i>Silene latifolia</i>        |                     | JF715055                                                                                                                                                                           |                                                                                                                                                            |
| <i>Solanum lycopersicum</i>    |                     | KP331414                                                                                                                                                                           |                                                                                                                                                            |
| <i>Styphnolobium japonicum</i> |                     |                                                                                                                                                                                    | Transcriptome, available at<br><a href="https://www.hindawi.com/journals/bmri/2014/750961/sup/">https://www.hindawi.com/journals/bmri/2014/750961/sup/</a> |
| <i>Swartzia emarginata</i>     | M.P. Morim 576 (RB) | MN579687, MN579720,<br>MN579755, MN579788,<br>MN579822, MN579854,<br>MN579889, MN579910,<br>MN579944, MN590564,<br>MN590594, MN590628,<br>MN590662, MN590693,<br>MN592347-MN592401 | <b>Newly sequenced</b>                                                                                                                                     |
| <i>Tachigali odoratissima</i>  | M.P. Morim 562 (RB) | KY045941, MN579688,<br>MN579721, MN579756,<br>MN579789, MN579823,<br>MN579855, MN579890,                                                                                           | <b>Newly sequenced</b>                                                                                                                                     |

|                                 |                   |                                                                                                                                                                                    |                                                                                                                                       |
|---------------------------------|-------------------|------------------------------------------------------------------------------------------------------------------------------------------------------------------------------------|---------------------------------------------------------------------------------------------------------------------------------------|
|                                 |                   | MN579945, MN590565,<br>MN590595, MN590629,<br>MN590663, MN590694,<br>MN592402-MN592458                                                                                             |                                                                                                                                       |
| <i>Tamarindus indica</i>        |                   | KJ468103                                                                                                                                                                           |                                                                                                                                       |
| <i>Theobroma cacao</i>          |                   | HQ244500                                                                                                                                                                           |                                                                                                                                       |
| <i>Tipuana tipu</i>             |                   |                                                                                                                                                                                    | Transcriptome, available at<br><a href="https://ics.hutton.ac.uk/tropiTree/">https://ics.hutton.ac.uk/tropiTree/</a>                  |
| <i>Trachelium caeruleum</i>     |                   | EU090187                                                                                                                                                                           |                                                                                                                                       |
| <i>Trifolium aureum</i>         |                   | KC894708                                                                                                                                                                           |                                                                                                                                       |
| <i>Trifolium repens</i>         |                   | KC894706                                                                                                                                                                           |                                                                                                                                       |
| <i>Trochodendron aralioides</i> |                   | KC608753                                                                                                                                                                           |                                                                                                                                       |
| <i>Vaccinium macrocarpon</i>    |                   | JQ757046                                                                                                                                                                           |                                                                                                                                       |
| <i>Vachellia tortilis</i>       | E. Koenen 603 (Z) | MN579689, MN579722,<br>MN579757, MN579790,<br>MN579824, MN579856,<br>MN579891, MN579911,<br>MN579946, MN590566,<br>MN590596, MN590630,<br>MN590664, MN590695,<br>MN592459-MN592510 | <b>Newly sequenced</b>                                                                                                                |
| <i>Vicia faba</i>               |                   | KF042344                                                                                                                                                                           | Different accession from the nuclear data set                                                                                         |
| <i>Vicia sativa</i>             |                   | KJ850242                                                                                                                                                                           |                                                                                                                                       |
| <i>Vigna radiata</i>            |                   | GQ893027                                                                                                                                                                           |                                                                                                                                       |
| <i>Vigna unguiculata</i>        |                   | JQ755301                                                                                                                                                                           |                                                                                                                                       |
| <i>Vitis vinifera</i>           |                   | DQ424856                                                                                                                                                                           |                                                                                                                                       |
| <i>Wisteria floribunda</i>      |                   |                                                                                                                                                                                    | Transcriptome, OneKP: RMWJ, available at<br><a href="http://www.onekp.com/public_data.html">http://www.onekp.com/public_data.html</a> |
| <i>Xanthocercis zambesiaca</i>  |                   |                                                                                                                                                                                    | Transcriptome, available at                                                                                                           |

|                                 |                            |                                                                                                                                                               |                                                                       |
|---------------------------------|----------------------------|---------------------------------------------------------------------------------------------------------------------------------------------------------------|-----------------------------------------------------------------------|
| <i>Xanthophyllum eurhynchum</i> | P. Herendeen H.416 (F)     | MN579690, MN579723, MN579758, MN579791, MN579825, MN579857, MN579892, MN579912, MN579947, MN590567, MN590597, MN590631, MN590665, MN590696, MN592511-MN592563 | <b>Newly sequenced</b>                                                |
| <i>Xylia hoffmannii</i>         | E. Koenen 402 (Z)          | MN579691, MN579724, MN579792, MN579826, MN579858, MN579893, MN579913, MN592564-MN592619                                                                       | <b>Newly sequenced</b>                                                |
| <i>Zenia insignis</i>           | Averyanov et al. 5748 (MT) | MN551240                                                                                                                                                      | <b>Newly sequenced;</b> Different accession from the nuclear data set |

---

**Table S2. Accession information for the taxa included in the nuclear genomic and transcriptomic data set.**

| <b>Taxon</b>                      | <b>Source</b>                                                                                                                   | <b>Citation</b>        |
|-----------------------------------|---------------------------------------------------------------------------------------------------------------------------------|------------------------|
| <i>Acacia koa</i>                 | Genbank BioProject: PRJNA268386                                                                                                 | Ishihara et al.        |
| <i>Acrocarpus fraxinifolius</i>   | TropiTree: <a href="https://ics.hutton.ac.uk/tropiTree/">https://ics.hutton.ac.uk/tropiTree/</a>                                | Russel et al. 2014     |
| <i>Azelia bella</i>               | Genbank BioProject: PRJNA472454                                                                                                 | <b>Newly sequenced</b> |
| <i>Albizia julibrissin</i>        | Genbank BioProject: PRJNA574148                                                                                                 | <b>Newly sequenced</b> |
| <i>Alnus serrulata</i>            | Dryad: <a href="http://dx.doi.org/10.5061/dryad.ff1tq">http://dx.doi.org/10.5061/dryad.ff1tq</a>                                | Cannon et al. 2015     |
| <i>Amaranthus hypochondriacus</i> | Phytozome v11: v1.0                                                                                                             | Clouse et al. 2016     |
| <i>Anthonotha fragrans</i>        | Genbank BioProject: PRJNA472454                                                                                                 | <b>Newly sequenced</b> |
| <i>Apios americana</i>            | Dryad: <a href="http://dx.doi.org/10.5061/dryad.ff1tq">http://dx.doi.org/10.5061/dryad.ff1tq</a>                                | Cannon et al. 2015     |
| <i>Aquilegia coerulea</i>         | Phytozome v11: v3.1                                                                                                             | Filiault et al. 2018   |
| <i>Arabidopsis thaliana</i>       | Phytozome v11: TAIR10                                                                                                           | Lamesch et al. 2012    |
| <i>Arachis ipaensis</i>           | Peanutbase.org: K30076.a1.M1                                                                                                    | Bertioli et al. 2016   |
| <i>Astragalus membranaceus</i>    | Dryad: <a href="http://dx.doi.org/10.5061/dryad.ff1tq">http://dx.doi.org/10.5061/dryad.ff1tq</a>                                | Cannon et al. 2015     |
| <i>Bauhinia tomentosa</i>         | Dryad: <a href="http://dx.doi.org/10.5061/dryad.ff1tq">http://dx.doi.org/10.5061/dryad.ff1tq</a>                                | Cannon et al. 2015     |
| <i>Bituminaria bituminosa</i>     | OneKP: TVSH                                                                                                                     | Wicket et al. 2014     |
| <i>Cajanus cajan</i>              | <a href="http://gigadb.org/dataset/100028">http://gigadb.org/dataset/100028</a>                                                 | Varshney et al. 2012   |
| <i>Cannabis sativa</i>            | Genbank BioProject: PRJNA74271                                                                                                  | van Bakel et al. 2011  |
| <i>Carica papaya</i>              | Phytozome v11: ASGPBv4.0                                                                                                        | Ming et al. 2008       |
| <i>Castanea mollissima</i>        | <a href="https://www.hardwoodgenomics.org/Genome-assembly/1962958">https://www.hardwoodgenomics.org/Genome-assembly/1962958</a> | <i>Not available</i>   |
| <i>Cercis canadensis</i>          | Dryad: <a href="http://dx.doi.org/10.5061/dryad.ff1tq">http://dx.doi.org/10.5061/dryad.ff1tq</a>                                | Cannon et al. 2015     |
| <i>Chamaecrista fasciculata</i>   | Dryad: <a href="http://dx.doi.org/10.5061/dryad.ff1tq">http://dx.doi.org/10.5061/dryad.ff1tq</a>                                | Cannon et al. 2015     |
| <i>Cicer arietinum</i>            | <a href="http://gigadb.org/dataset/100076">http://gigadb.org/dataset/100076</a>                                                 | Varshney et al. 2013   |
| <i>Citrus sinensis</i>            | Phytozome v11: v1.1                                                                                                             | Wu et al. 2014         |

|                                  |                                                                                                                                 |                             |
|----------------------------------|---------------------------------------------------------------------------------------------------------------------------------|-----------------------------|
| <i>Cladrastis lutea</i>          | Dryad: <a href="http://dx.doi.org/10.5061/dryad.ff1tq">http://dx.doi.org/10.5061/dryad.ff1tq</a>                                | Cannon et al. 2015          |
| <i>Codariocalyx motorius</i>     | Dryad: <a href="http://dx.doi.org/10.5061/dryad.ff1tq">http://dx.doi.org/10.5061/dryad.ff1tq</a>                                | Cannon et al. 2015          |
| <i>Copaifera officinalis</i>     | Dryad: <a href="http://dx.doi.org/10.5061/dryad.ff1tq">http://dx.doi.org/10.5061/dryad.ff1tq</a>                                | Cannon et al. 2015          |
| <i>Cucumis sativus</i>           | Phytozome v11: v1.0                                                                                                             | <i>Not available</i>        |
| <i>Desmanthus illinoensis</i>    | Dryad: <a href="http://dx.doi.org/10.5061/dryad.ff1tq">http://dx.doi.org/10.5061/dryad.ff1tq</a>                                | Cannon et al. 2015          |
| <i>Elaeocarpus photiniifolia</i> | Genbank BioProject: PRJDA67329                                                                                                  | Sugai et al. 2012           |
| <i>Entada abyssinica</i>         | Genbank BioProject: PRJNA574148                                                                                                 | <b>Newly sequenced</b>      |
| <i>Eucalyptus grandis</i>        | Phytozome v11: v2.0                                                                                                             | Bartholomé et al. 2015      |
| <i>Fragaria vesca</i>            | Phytozome v11: v1.1                                                                                                             | Shulaev et al. 2011         |
| <i>Gleditsia triacanthos</i>     | Dryad: <a href="http://dx.doi.org/10.5061/dryad.ff1tq">http://dx.doi.org/10.5061/dryad.ff1tq</a>                                | Cannon et al. 2015          |
| <i>Glycine max</i>               | Phytozome v11: Wm82.a2.v1                                                                                                       | Schmutz et al. 2010         |
| <i>Glycyrrhiza lepidota</i>      | Dryad: <a href="http://dx.doi.org/10.5061/dryad.ff1tq">http://dx.doi.org/10.5061/dryad.ff1tq</a>                                | Cannon et al. 2015          |
| <i>Gossypium raimondii</i>       | Phytozome v11: v2.1                                                                                                             | Paterson et al. 2012        |
| <i>Gymnocladus dioicus</i>       | Dryad: <a href="http://dx.doi.org/10.5061/dryad.ff1tq">http://dx.doi.org/10.5061/dryad.ff1tq</a>                                | Cannon et al. 2015          |
| <i>Inga spectabilis</i>          | <a href="https://doi.org/10.5061/dryad.r9c12">https://doi.org/10.5061/dryad.r9c12</a>                                           | Nicholls et al. 2015        |
| <i>Juglans regia</i>             | <a href="https://www.hardwoodgenomics.org/Genome-assembly/2209485">https://www.hardwoodgenomics.org/Genome-assembly/2209485</a> | Martínez-García et al. 2016 |
| <i>Lactuca sativa</i>            | Genbank BioProject: PRJNA65477                                                                                                  | <i>Not available</i>        |
| <i>Lathyrus sativus</i>          | Dryad: <a href="http://dx.doi.org/10.5061/dryad.ff1tq">http://dx.doi.org/10.5061/dryad.ff1tq</a>                                | Cannon et al. 2015          |
| <i>Lens culinaris</i>            | Genbank BioProject: PRJNA65667                                                                                                  | Kaur et al. 2011            |
| <i>Linum usitatissimum</i>       | Phytozome v11: v1.0                                                                                                             | Wang et al. 2012            |
| <i>Lotus japonicus</i>           | <a href="http://www.plantgdb.org/LjGDB/">http://www.plantgdb.org/LjGDB/</a>                                                     | Sato et al. 2008            |
| <i>Lupinus angustifolius</i>     | Dryad: <a href="http://dx.doi.org/10.5061/dryad.ff1tq">http://dx.doi.org/10.5061/dryad.ff1tq</a>                                | Cannon et al. 2015          |
| <i>Lupinus polyphyllus</i>       | Dryad: <a href="http://dx.doi.org/10.5061/dryad.ff1tq">http://dx.doi.org/10.5061/dryad.ff1tq</a>                                | Cannon et al. 2015          |
| <i>Manihot esculenta</i>         | Phytozome v11: v6.1                                                                                                             | Bredeson et al. 2016        |
| <i>Medicago truncatula</i>       | Phytozome v11: Mt4.0v1                                                                                                          | Young et al. 2011           |

|                                |                                                                                                                             |                                                    |
|--------------------------------|-----------------------------------------------------------------------------------------------------------------------------|----------------------------------------------------|
| <i>Microlobius foetidus</i>    | Genbank BioProject: PRJNA574148                                                                                             | <b>Newly sequenced</b>                             |
| <i>Mimulus guttatus</i>        | Phytozome v11: v2.0                                                                                                         | Hellsten et al. 2013                               |
| <i>Morus notabilis</i>         | Genbank BioProject: PRJNA202089 (assembly version ASM41409v2)                                                               | He et al. 2013                                     |
| <i>Nelumbo nucifera</i>        | Genbank BioProject: PRJNA264089 (assembly version 1.1)                                                                      | Ming et al. 2013                                   |
| <i>Paeonia lactiflora</i>      | Genbank BioProject: PRJNA245064                                                                                             | Zhang et al. 2015                                  |
| <i>Panax ginseng</i>           | Genbank BioProject: PRJNA173906                                                                                             | Li et al. 2013                                     |
| <i>Papaver somniferum</i>      | Dryad: <a href="http://dx.doi.org/10.5061/dryad.ff1tq">http://dx.doi.org/10.5061/dryad.ff1tq</a>                            | Cannon et al. 2015                                 |
| <i>Phaseolus vulgaris</i>      | Phytozome v11: v1.0                                                                                                         | Schmutz et al. 2014                                |
| <i>Pisum sativum</i>           | Genbank BioProject: PRJNA211622                                                                                             | Duarte et al. 2014                                 |
| <i>Polygala lutea</i>          | Dryad: <a href="http://dx.doi.org/10.5061/dryad.ff1tq">http://dx.doi.org/10.5061/dryad.ff1tq</a>                            | Cannon et al. 2015                                 |
| <i>Populus trichocarpa</i>     | Phytozome v11: v3.0                                                                                                         | Tuskan et al. 2006                                 |
| <i>Primula veris</i>           | <a href="https://doi.org/10.5061/dryad.2s200">https://doi.org/10.5061/dryad.2s200</a>                                       | Nowak et al. 2015                                  |
| <i>Prioria balsamifera</i>     | Genbank BioProject: PRJNA472454                                                                                             | <b>Newly sequenced</b>                             |
| <i>Prosopis alba</i>           | Genbank BioProject: PRJNA218545                                                                                             | Torales et al. 2013                                |
|                                |                                                                                                                             | International Peach Genome Initiative et al., 2013 |
| <i>Prunus persica</i>          | Phytozome v11: v2.1                                                                                                         |                                                    |
| <i>Punica granatum</i>         | Genbank BioProject: PRJNA231033                                                                                             | Ophir et al. 2014                                  |
| <i>Quillaja saponaria</i>      | Dryad: <a href="http://dx.doi.org/10.5061/dryad.ff1tq">http://dx.doi.org/10.5061/dryad.ff1tq</a>                            | Cannon et al. 2015                                 |
| <i>Salix purpurea</i>          | Phytozome v11: v1.0                                                                                                         | Zhou et al. 2018                                   |
| <i>Senna hebecarpa</i>         | Dryad: <a href="http://dx.doi.org/10.5061/dryad.ff1tq">http://dx.doi.org/10.5061/dryad.ff1tq</a>                            | Cannon et al. 2015                                 |
| <i>Solanum tuberosum</i>       | Phytozome v11: v3.4                                                                                                         | Sharma et al. 2013                                 |
| <i>Styphnolobium japonicum</i> | <a href="https://www.hindawi.com/journals/bmri/2014/750961/sup/">https://www.hindawi.com/journals/bmri/2014/750961/sup/</a> | Zhu et al. 2014                                    |
| <i>Theobroma cacao</i>         | Phytozome v11: v1.1                                                                                                         | Motamayor et al. 2013                              |
| <i>Trifolium pratense</i>      | Genbank BioProject: PRJNA219226                                                                                             | Yates et al. 2014                                  |
| <i>Tripterygium wilfordii</i>  | Genbank BioProject: PRJNA218574                                                                                             | <i>Not available</i>                               |

|                                |                                                                                                  |                     |
|--------------------------------|--------------------------------------------------------------------------------------------------|---------------------|
| <i>Vicia faba</i>              | Genbank BioProject: PRJNA81211                                                                   | Kaur et al. 2012    |
| <i>Vigna radiata</i>           | ftp://plantgenomics.snu.ac.kr/mungbean_data/                                                     | Kang et al. 2014    |
| <i>Vitis vinifera</i>          | Phytozome v11: Genoscope.12X                                                                     | Jaillon et al. 2007 |
| <i>Xanthocercis zambesiaca</i> | Dryad: <a href="http://dx.doi.org/10.5061/dryad.ff1tq">http://dx.doi.org/10.5061/dryad.ff1tq</a> | Cannon et al. 2015  |
| <i>Zenia insignis</i>          | Genbank BioProject: PRJNA285444                                                                  | Not available       |

Phytozome is available at <https://phytozome.jgi.doe.gov>

OneKP data is available at [http://www.onekp.com/public\\_data.html](http://www.onekp.com/public_data.html)

## References

- Bertioli DJ, Cannon SB, Froenicke L, Huang G, Farmer AD, Cannon EKS, et al. The genome sequences of *Arachis duranensis* and *Arachis ipaensis*, the diploid ancestors of cultivated peanut. *Nat Genet.* 2016 Apr;48(4):438–446.
- Bredeson JV, Lyons JB, Prochnik SE, Wu GA, Ha CM, Edsinger-Gonzales E, et al. Sequencing wild and cultivated cassava and related species reveals extensive interspecific hybridization and genetic diversity. *Nat Biotechnol.* 2016 May;34(5):562–570.
- Clouse JW, Adhikary D, Page JT, Ramaraj T, Deyholos MK, Udall JA, et al. The Amaranth Genome: Genome, Transcriptome, and Physical Map Assembly. *Plant Genome.* 2016 Mar;9:1.
- Duarte J, Rivièrè N, Baranger A, Aubert G, Igoire, Burstin J, Cornet L, et al. Transcriptome sequencing for high throughput SNP development and genetic mapping in Pea. *BMC Genomics.* 2014 Feb;15:126.
- Filiault DL, Ballerini ES, Mandáková T, Aköz G, Derieg NJ, Schmutz J, et al. The *Aquilegia* genome provides insight into adaptive radiation and reveals an extraordinarily polymorphic chromosome with a unique history. *eLife.* 2018 Oct;
- He N, Zhang C, Qi X, Zhao S, Tao Y, Yang G, et al. Draft genome sequence of the mulberry tree *Morus notabilis*. *Nat Commun.* 2013;4:2445.
- Hellsten U, Wright KM, Jenkins J, Shu S, Yuan Y, Wessler SR, et al. Fine-scale variation in meiotic recombination in *Mimulus* inferred from population shotgun sequencing. *PNAS.* 2013 Nov;110(48):19478–19482.
- Jaillon O, Aury J-M, Noel B, Policriti A, Clepet C, Casagrande A, et al. The grapevine genome sequence suggests ancestral hexaploidization in major angiosperm phyla. *Nature.* 2007 Sep;449(7161):463–467.
- Kaur S, Cogan NOI, Pembleton LW, Shinozuka M, Savin KW, Materne M, et al. Transcriptome sequencing of lentil based on second-generation technology permits large-scale unigene assembly and SSR marker discovery. *BMC Genomics.* 2011 May;12:265.
- Kaur S, Pembleton LW, Cogan NOI, Savin KW, Leonforte T, Paull J, et al. Transcriptome sequencing of field pea and faba bean for discovery and validation of SSR genetic markers. *BMC Genomics.* 2012 Mar;13:104.
- Lamesch P, Berardini TZ, Li D, Swarbreck D, Wilks C, Sasidharan R, et al. The Arabidopsis Information Resource (TAIR): improved gene annotation and new tools. *Nucleic Acids Res.* 2012 Jan;40(Database):issue.
- Li C, Zhu Y, Guo X, Sun C, Luo H, Song J, et al. Transcriptome analysis reveals ginsenosides biosynthetic genes, microRNAs and simple sequence repeats in *Panax ginseng* C. A. Meyer. *BMC Genomics.* 2013 Apr;14:245.

- Martínez-García PJ, Crepeau MW, Puiu D, Gonzalez-Ibeas D, Whalen J, Stevens KA, et al. The walnut (*Juglans regia*) genome sequence reveals diversity in genes coding for the biosynthesis of non-structural polyphenols. *Plant J*. 2016 Sep;87(5):507–532.
- Ming R, Hou S, Feng Y, Yu Q, Dionne-Laporte A, Saw JH, et al. The draft genome of the transgenic tropical fruit tree papaya (*Carica papaya* Linnaeus). *Nature*. 2008 Apr;452(7190):991–996.
- Ming R, VanBuren R, Liu Y, Yang M, Han Y, Li L-T, et al. Genome of the long-living sacred lotus (*Nelumbo nucifera* Gaertn.). *Genome Biol*. 2013 May;14(5):R41.
- Moore MJ, Hassan N, Gitzendanner MA, Bruenn RA, Croley M, Vandeventer A, et al. Phylogenetic Analysis of the Plastid Inverted Repeat for 244 Species: Insights into Deeper-Level Angiosperm Relationships from a Long, Slowly Evolving Sequence Region. *International Journal of Plant Sciences*. 2011 May;172(4):541–558.
- Moore MJ, Soltis PS, Bell CD, Burleigh JG, Soltis DE. Phylogenetic analysis of 83 plastid genes further resolves the early diversification of eudicots. *PNAS*. 2010 Mar;107(10):4623–4628.
- Motamayor JC, Mockaitis K, Schmutz J, Haiminen N, Livingstone D, Cornejo O, et al. The genome sequence of the most widely cultivated cacao type and its use to identify candidate genes regulating pod color. *Genome Biol*. 2013 Jun;14(6):r53.
- Myburg AA, Grattapaglia D, Tuskan GA, Hellsten U, Hayes RD, Grimwood J, et al. The genome of *Eucalyptus grandis*. *Nature*. 2014 Jun;510(7505):356–362.
- Nicholls JA, Pennington RT, Koenen EJ, Hughes CE, Hearn J, Bunnefeld L, et al. Using targeted enrichment of nuclear genes to increase phylogenetic resolution in the neotropical rain forest genus *Inga* (Leguminosae: Mimosoideae). *Front Plant Sci*. 2015 Sep;6.
- Nowak MD, Russo G, Schlapbach R, Huu CN, Lenhard M, Conti E. The draft genome of *Primula veris* yields insights into the molecular basis of heterostyly. *Genome Biol*. 2015 Jan;16:12.
- Ophir R, Sherman A, Rubinstein M, Eshed R, Sharabi Schwager M, Harel-Beja R, et al. Single-nucleotide polymorphism markers from de-novo assembly of the pomegranate transcriptome reveal germplasm genetic diversity. *PLoS One*. 2014 Feb;9(2):e88998.
- Paterson AH, Wendel JF, Gundlach H, Guo H, Jenkins J, Jin D, et al. Repeated polyploidization of *Gossypium* genomes and the evolution of spinnable cotton fibres. *Nature*. 2012 Dec;492(7429):423–427.
- Schmutz J, Cannon SB, Schlueter J, Ma J, Mitros T, Nelson W, et al. Genome sequence of the palaeopolyploid soybean. *Nature*. 2010 Jan;463(7278):178–183.
- Schmutz J, McClean PE, Mamidi S, Wu GA, Cannon SB, Grimwood J, et al. A reference genome for common bean and genome-wide analysis of dual domestications. *Nat Genet*. 2014 Jun;46(7):707.
- Sharma SK, Bolser D, de Boer J, Sønderkær M, Amoros W, Carboni MF, et al. Construction of reference chromosome-scale pseudomolecules for potato: integrating the potato genome with genetic and physical maps. *G3 (Bethesda)*. 2013 Nov;3(11):2031–2047.
- Shulaev V, Sargent DJ, Crowhurst RN, Mockler TC, Folkerts O, Delcher AL, et al. The genome of woodland strawberry (*Fragaria vesca*). *Nat Genet*. 2011 Feb;43(2):109–116.
- Sugai K, Setsuko S, Uchiyama K, Murakami N, Kato H, Yoshimaru H. Development of EST-SSR markers for *Elaeocarpus photiniifolia* (*Elaeocarpaceae*), an endemic taxon of the Bonin Islands. *Am J Bot*. 2012 Feb;99(2):84–87.



- Torales SL, Rivarola M, Iximo, Pomponio M, Iria F, Gonzalez S, Acuña CV, Fernández P, et al. De novo assembly and characterization of leaf transcriptome for the development of functional molecular markers of the extremophile multipurpose tree species *Prosopis alba*. *BMC Genomics*. 2013 Oct;14:705.
- Tuskan GA, Difazio S, Jansson S, Bohlmann J, Grigoriev I, Hellsten U, et al. The genome of black cottonwood, *Populus trichocarpa* (Torr. & Gray). *Science*. 2006 Sep;313(5793):1596–1604.
- van Bakel H, Stout JM, Cote AG, Tallon CM, Sharpe AG, Hughes TR, et al. The draft genome and transcriptome of *Cannabis sativa*. *Genome Biol*. 2011 Oct;12(10):R102.
- Varshney RK, Song C, Saxena RK, Azam S, Yu S, Sharpe AG, et al. Draft genome sequence of chickpea (*Cicer arietinum*) provides a resource for trait improvement. *Nat Biotechnol*. 2013 Mar;31(3):240–246.
- Wang H, Moore MJ, Soltis PS, Bell CD, Brockington SF, Alexandre R, et al. Rosid radiation and the rapid rise of angiosperm-dominated forests. *Proc Natl Acad Sci USA*. 2009 Mar;106(10):3853–3858.
- Wang Z, Hobson N, Galindo L, Zhu S, Shi D, McDill J, et al. The genome of flax (*Linum usitatissimum*) assembled de novo from short shotgun sequence reads. *Plant J*. 2012 Nov;72(3):461–473.
- Wickett NJ, Mirarab S, Nguyen N, Warnow T, Carpenter E, Matasci N, et al. Phylotranscriptomic analysis of the origin and early diversification of land plants. *Proc Natl Acad Sci USA*. 2014 Nov;111(45):E4859–E4868.
- Wu GA, Prochnik S, Jenkins J, Salse J, Hellsten U, Murat F, et al. Sequencing of diverse mandarin, pummelo and orange genomes reveals complex history of admixture during citrus domestication. *Nat Biotechnol*. 2014 Jul;32(7):656–662.
- Xi Z, Ruhfel BR, Schaefer H, Amorim A i M, Sugumaran M, Wurdack KJ, et al. Phylogenomics and a posteriori data partitioning resolve the Cretaceous angiosperm radiation Malpighiales. *PNAS*. 2012 Oct;109(43):17519–17524.
- Yates SA, Swain MT, Hegarty MJ, Chernukin I, Lowe M, Allison GG, et al. De novo assembly of red clover transcriptome based on RNA-Seq data provides insight into drought response, gene discovery and marker identification. *BMC Genomics*. 2014 Jun;15:453.
- Young ND, Debellé F, Oldroyd GED, Geurts R, Cannon SB, Udvardi MK, et al. The *Medicago* genome provides insight into the evolution of rhizobial symbioses. *Nature*. 2011 Nov;480(7378):520–524.
- Zhang J, Wu Y, Li D, Wang G, Li X, Xia Y. Transcriptomic analysis of the underground renewal buds during dormancy transition and release in “Hangbaishao” peony (*Paeonia lactiflora*). *PLoS One*. 2015 Mar;10(3):e0119118.
- Zhou R, Macaya-Sanz D, Rodgers-Melnick E, Carlson CH, Gouker FE, Evans LM, et al. Characterization of a large sex determination region in *Salix purpurea* L. (Salicaceae). *Mol Genet Genomics*. 2018 Jul;1–16.
- Zhu L, Zhang Y, Guo W, Xu X-J, Wang Q. De Novo Assembly and Characterization of *Sophora japonica* Transcriptome Using RNA-seq. *Biomed Res Int*. 2014 Jan;2014.

**Table S3. Counts and percentages of bipartitions representing nodes A-H and conflicting bipartitions representing other subfamily relationships among 3,473 gene trees.**

| Clade                                          | ML    |            | >50%<br>bootstrap support |            | >80%<br>bootstrap support |            |
|------------------------------------------------|-------|------------|---------------------------|------------|---------------------------|------------|
|                                                | count | percentage | count                     | percentage | count                     | percentage |
| <i>bipartitions of best supported topology</i> |       |            |                           |            |                           |            |
| Leguminosae (node A)                           | 2669  | 76.85%     | 2254                      | 64.90%     | 1660                      | 47.80%     |
| Cerc + Detar (node B)                          | 744   | 21.42%     | 325                       | 9.36%      | 48                        | 1.38%      |
| Cercidoideae (node C)                          | 1815  | 52.26%     | 1705                      | 49.09%     | 1394                      | 40.14%     |
| Detarioideae (node D)                          | 3041  | 87.56%     | 2918                      | 84.02%     | 2585                      | 74.43%     |
| Pap + Caes + Dial (node E)                     | 794   | 22.86%     | 360                       | 10.37%     | 91                        | 2.62%      |
| Pap + Caes (node F)                            | 599   | 17.25%     | 231                       | 6.65%      | 42                        | 1.21%      |
| Caesalpinioideae (node G)                      | 2114  | 60.87%     | 1712                      | 49.29%     | 1151                      | 33.14%     |
| Papilionoideae (node H)                        | 2456  | 70.72%     | 1957                      | 56.35%     | 1248                      | 35.93%     |
| <i>conflicting bipartitions</i>                |       |            |                           |            |                           |            |
| Pap + Caes + Dial + Detar                      | 625   | 18.00%     | 258                       | 7.43%      | 34                        | 0.98%      |
| Pap + Caes + Dial + Cerc                       | 546   | 15.72%     | 194                       | 5.59%      | 20                        | 0.58%      |
| Pap + Dial                                     | 446   | 12.84%     | 133                       | 3.83%      | 20                        | 0.58%      |
| Caes + Dial                                    | 448   | 12.90%     | 132                       | 3.80%      | 16                        | 0.46%      |
| Dial + Cerc                                    | 295   | 8.49%      | 93                        | 2.68%      | 7                         | 0.20%      |
| Dial + Detar                                   | 307   | 8.84%      | 96                        | 2.76%      | 4                         | 0.12%      |
| Caes + Dial + Cerc + Detar                     | 247   | 7.11%      | 47                        | 1.35%      | 4                         | 0.12%      |
| Pap + Dial + Cerc + Detar                      | 196   | 5.64%      | 29                        | 0.84%      | 4                         | 0.12%      |
| Caes + Detar                                   | 200   | 5.76%      | 44                        | 1.27%      | 3                         | 0.09%      |
| Pap + Caes + Cerc + Detar                      | 234   | 6.74%      | 46                        | 1.32%      | 2                         | 0.06%      |
| Pap + Detar                                    | 189   | 5.44%      | 41                        | 1.18%      | 2                         | 0.06%      |
| Caes + Cerc                                    | 163   | 4.69%      | 37                        | 1.07%      | 2                         | 0.06%      |
| Pap + Cerc                                     | 173   | 4.98%      | 30                        | 0.86%      | 2                         | 0.06%      |
| Pap + Caes + Detar                             | 153   | 4.41%      | 27                        | 0.78%      | 1                         | 0.03%      |
| Dial + Cerc + Detar                            | 202   | 5.82%      | 21                        | 0.60%      | 1                         | 0.03%      |
| Pap + Dial + Detar                             | 122   | 3.51%      | 12                        | 0.35%      | 1                         | 0.03%      |
| Caes + Dial + Cerc                             | 121   | 3.48%      | 16                        | 0.46%      | 0                         | 0.00%      |
| Pap + Caes + Cerc                              | 132   | 3.80%      | 15                        | 0.43%      | 0                         | 0.00%      |
| Caes + Cerc + Detar                            | 127   | 3.66%      | 14                        | 0.40%      | 0                         | 0.00%      |
| Pap + Dial + Cerc                              | 110   | 3.17%      | 12                        | 0.35%      | 0                         | 0.00%      |
| Caes + Dial + Detar                            | 134   | 3.86%      | 11                        | 0.32%      | 0                         | 0.00%      |
| Pap + Cerc + Detar                             | 115   | 3.31%      | 9                         | 0.26%      | 0                         | 0.00%      |

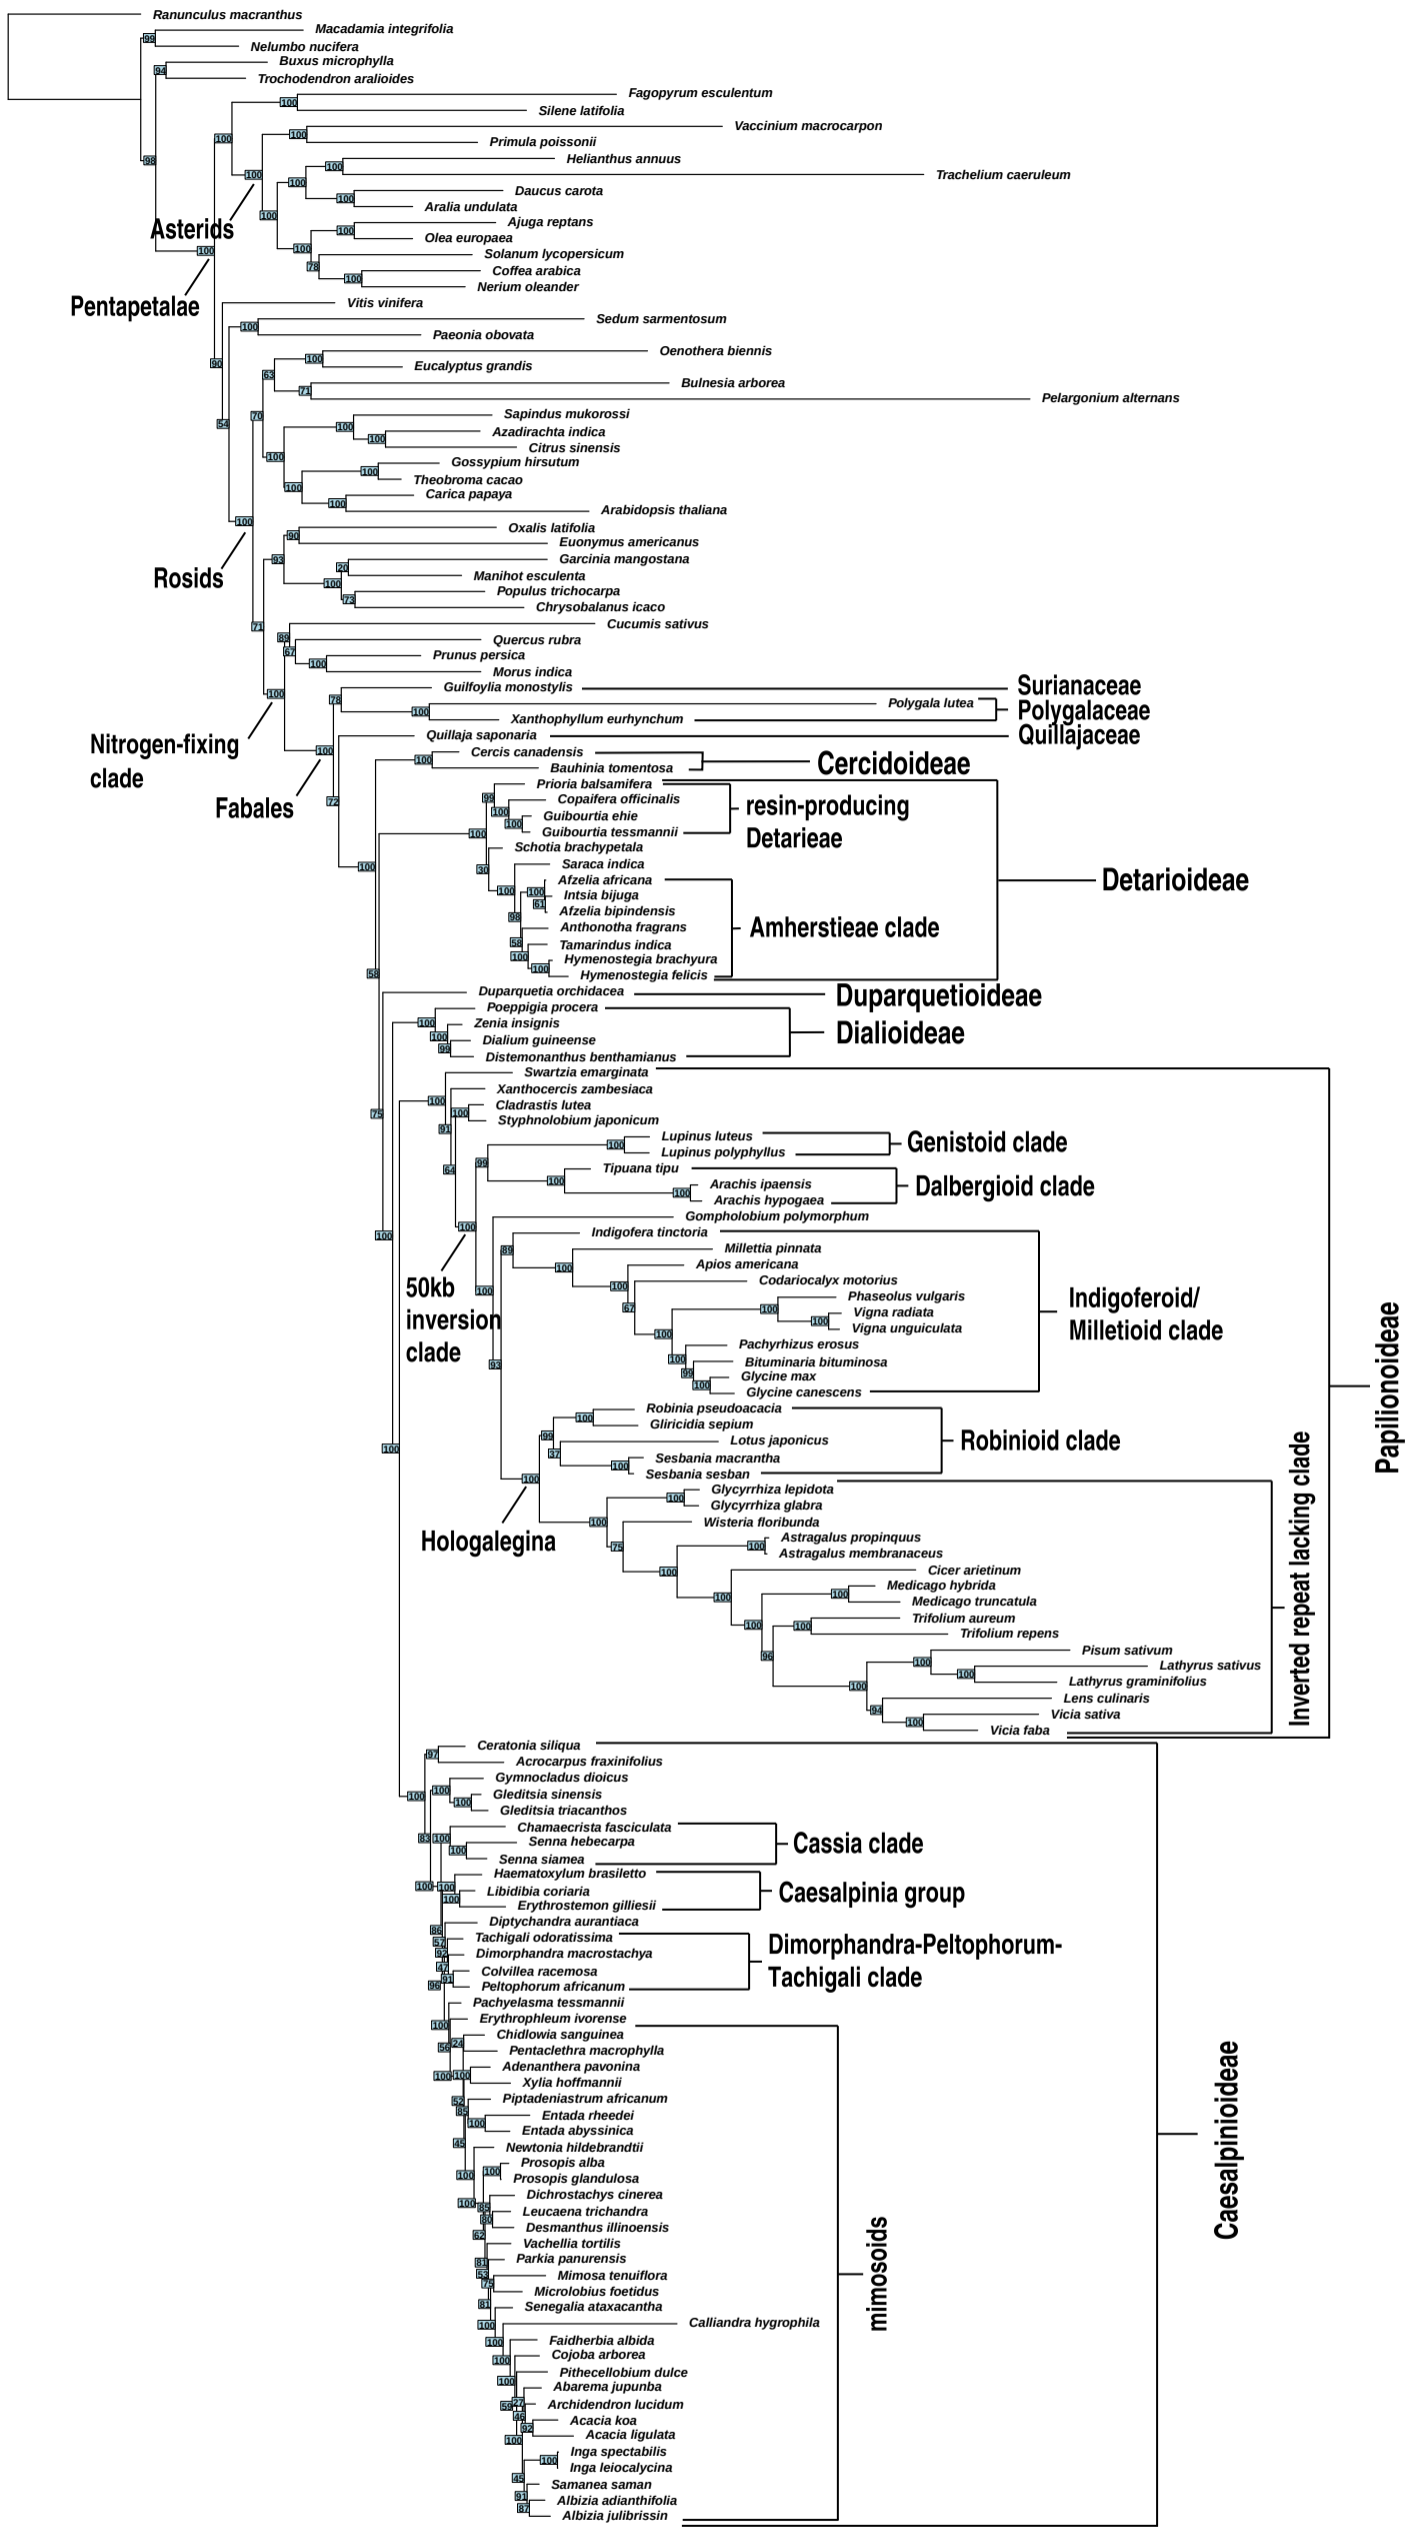

**Figure S1. ML topology as inferred by RAxML from amino acid alignment of chloroplast genes under the LG4X model. Numbers on nodes indicate bootstrap percentages estimated from 1000 replicates.**

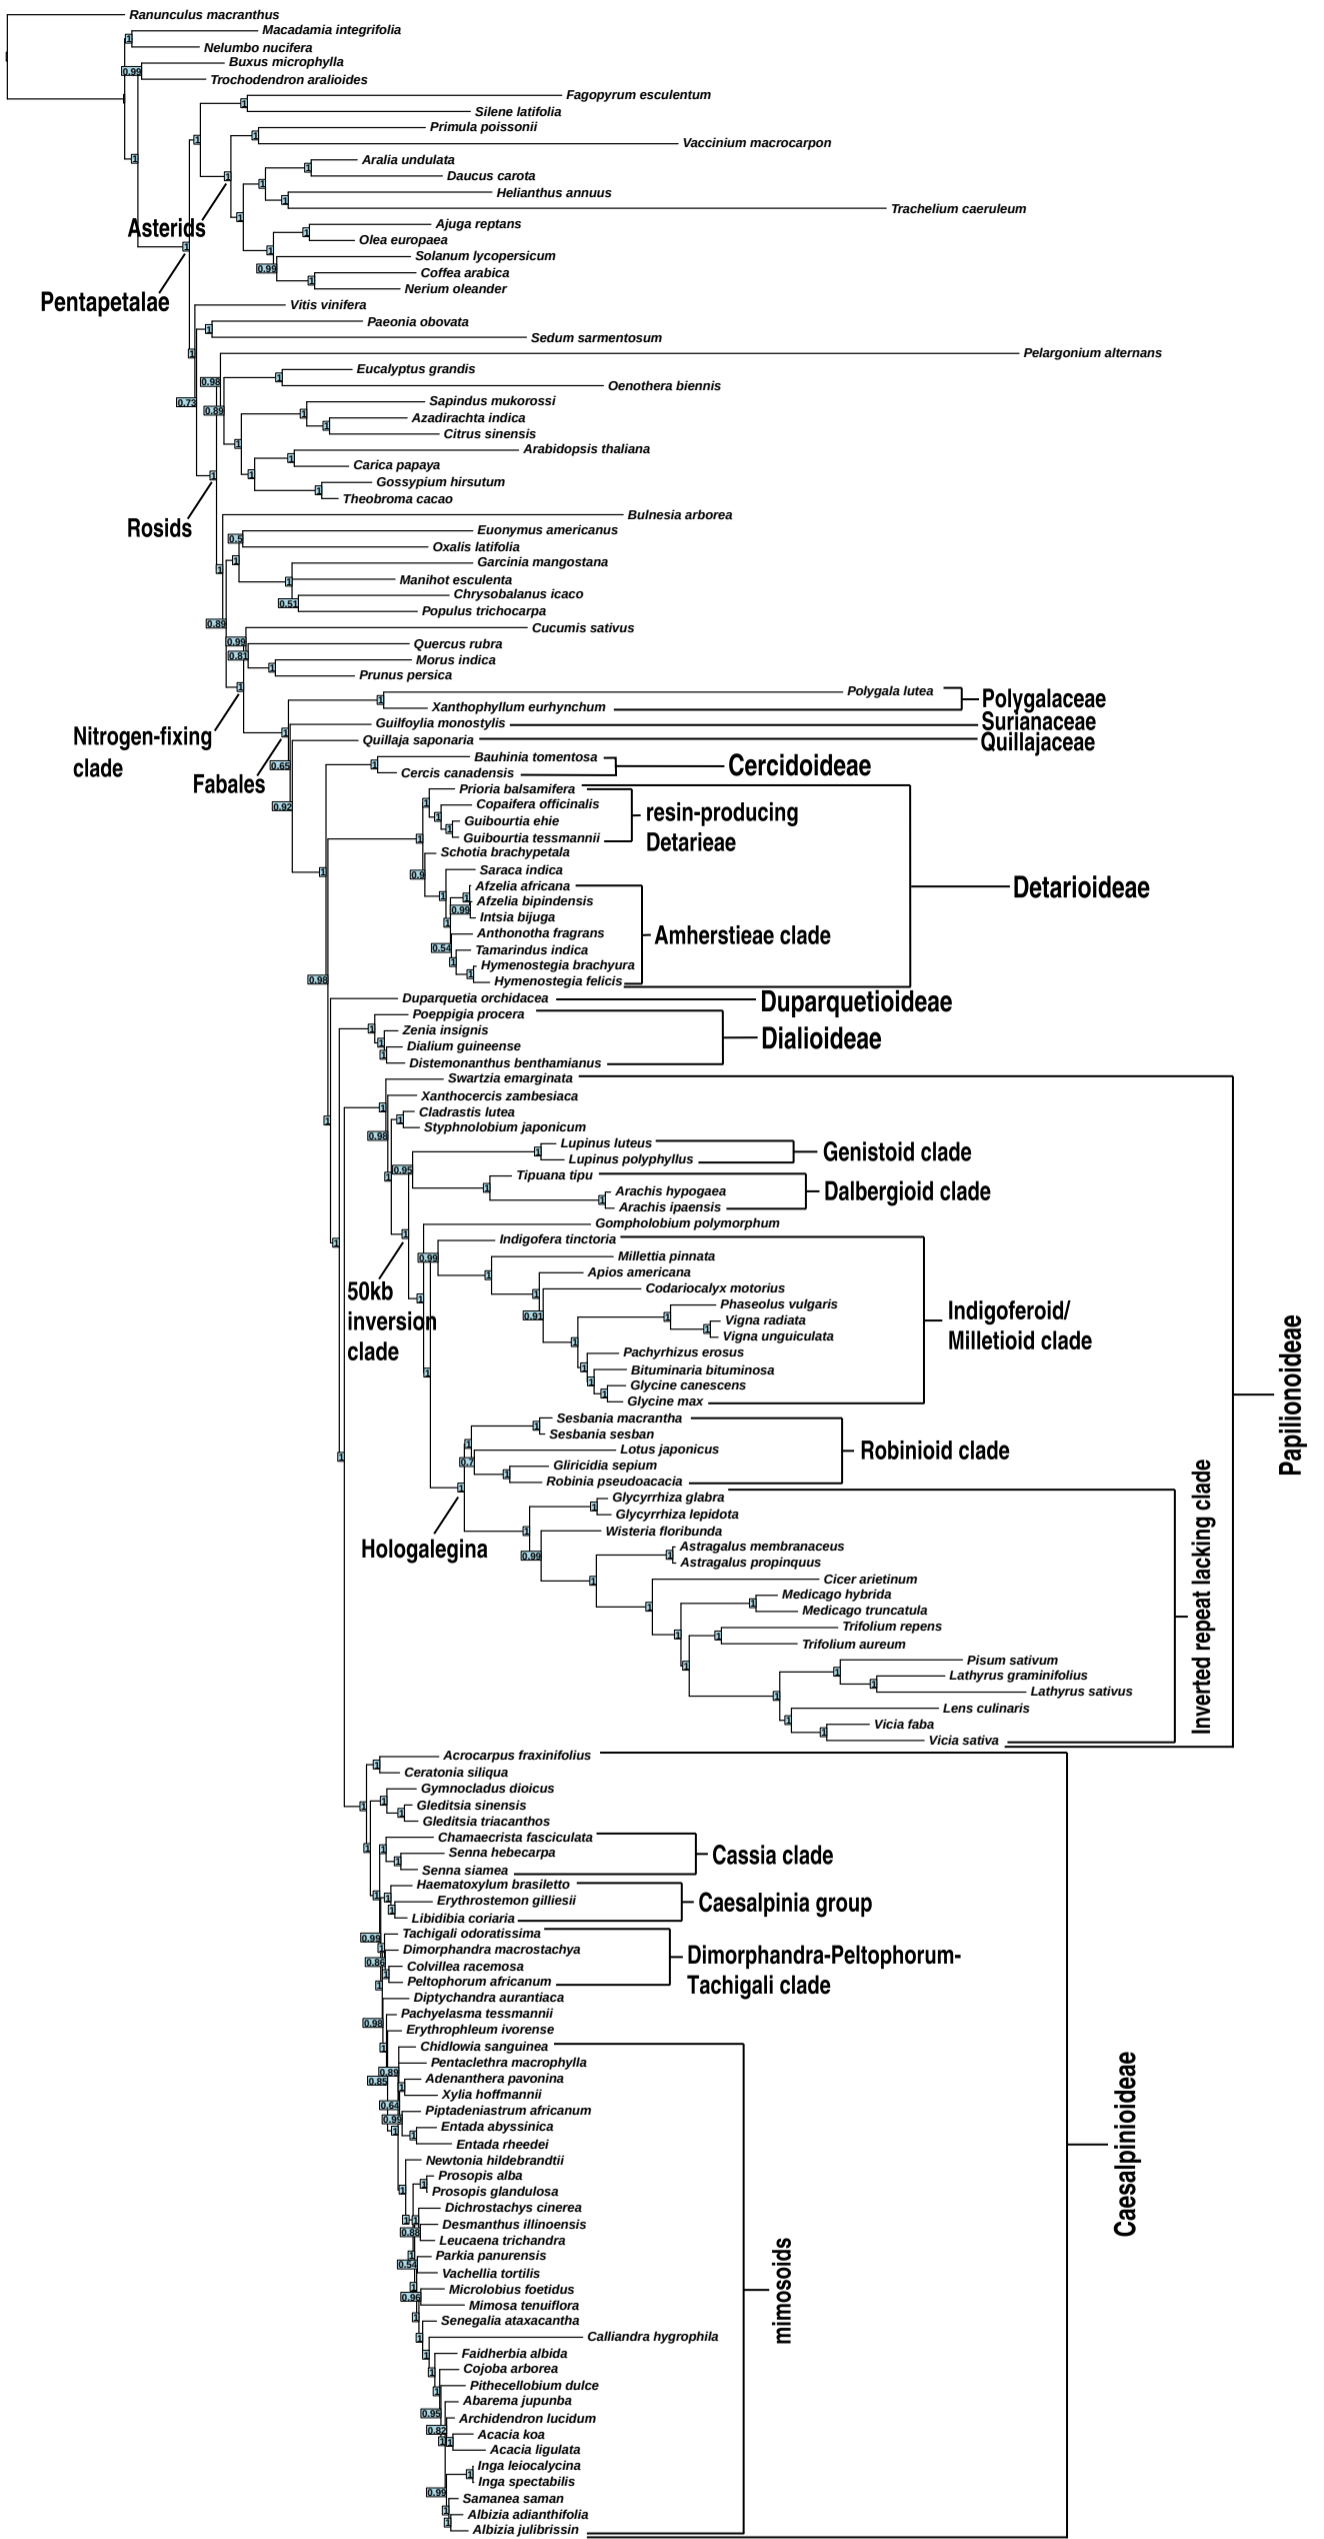

Figure S2. Bayesian majority-rule consensus tree inferred with Phylobayes from amino acid alignment of chloroplast genes under the CATGTR model. Numbers on nodes indicate posterior probabilities (pp) from 9000 post-burn-in MCMC cycles.

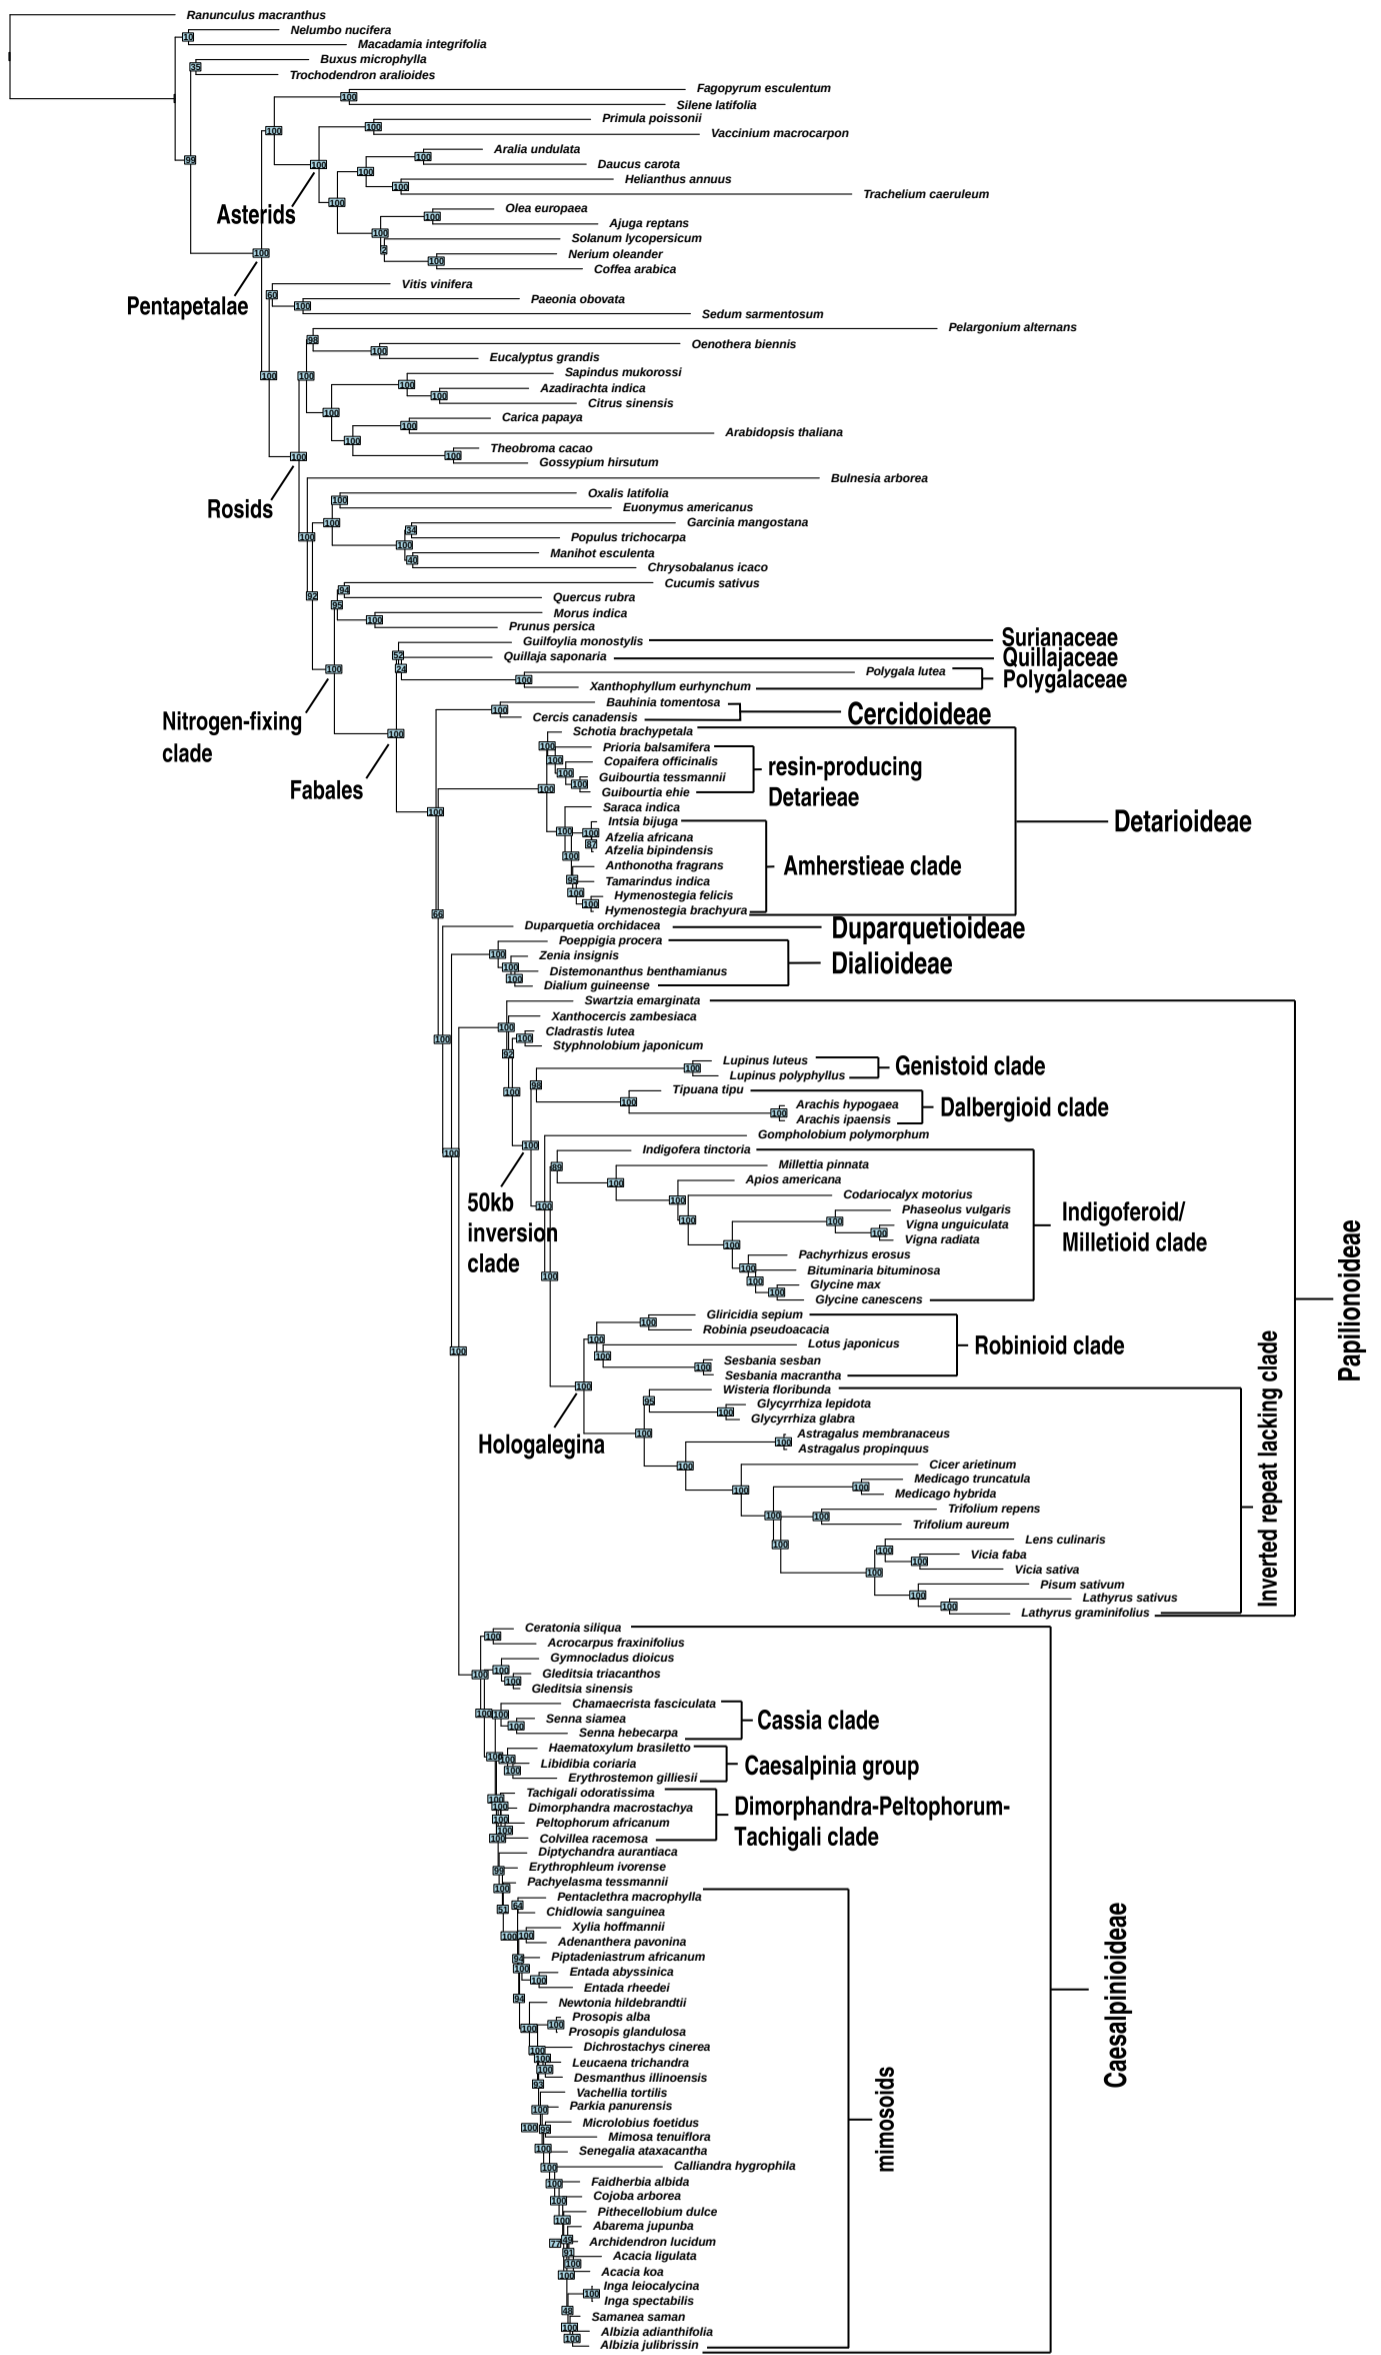

Figure S3. ML topology as inferred by RAxML from nucleotide alignment of chloroplast genes under the GTR + G model. Numbers on nodes indicate bootstrap percentages estimated from 1000 replicates.

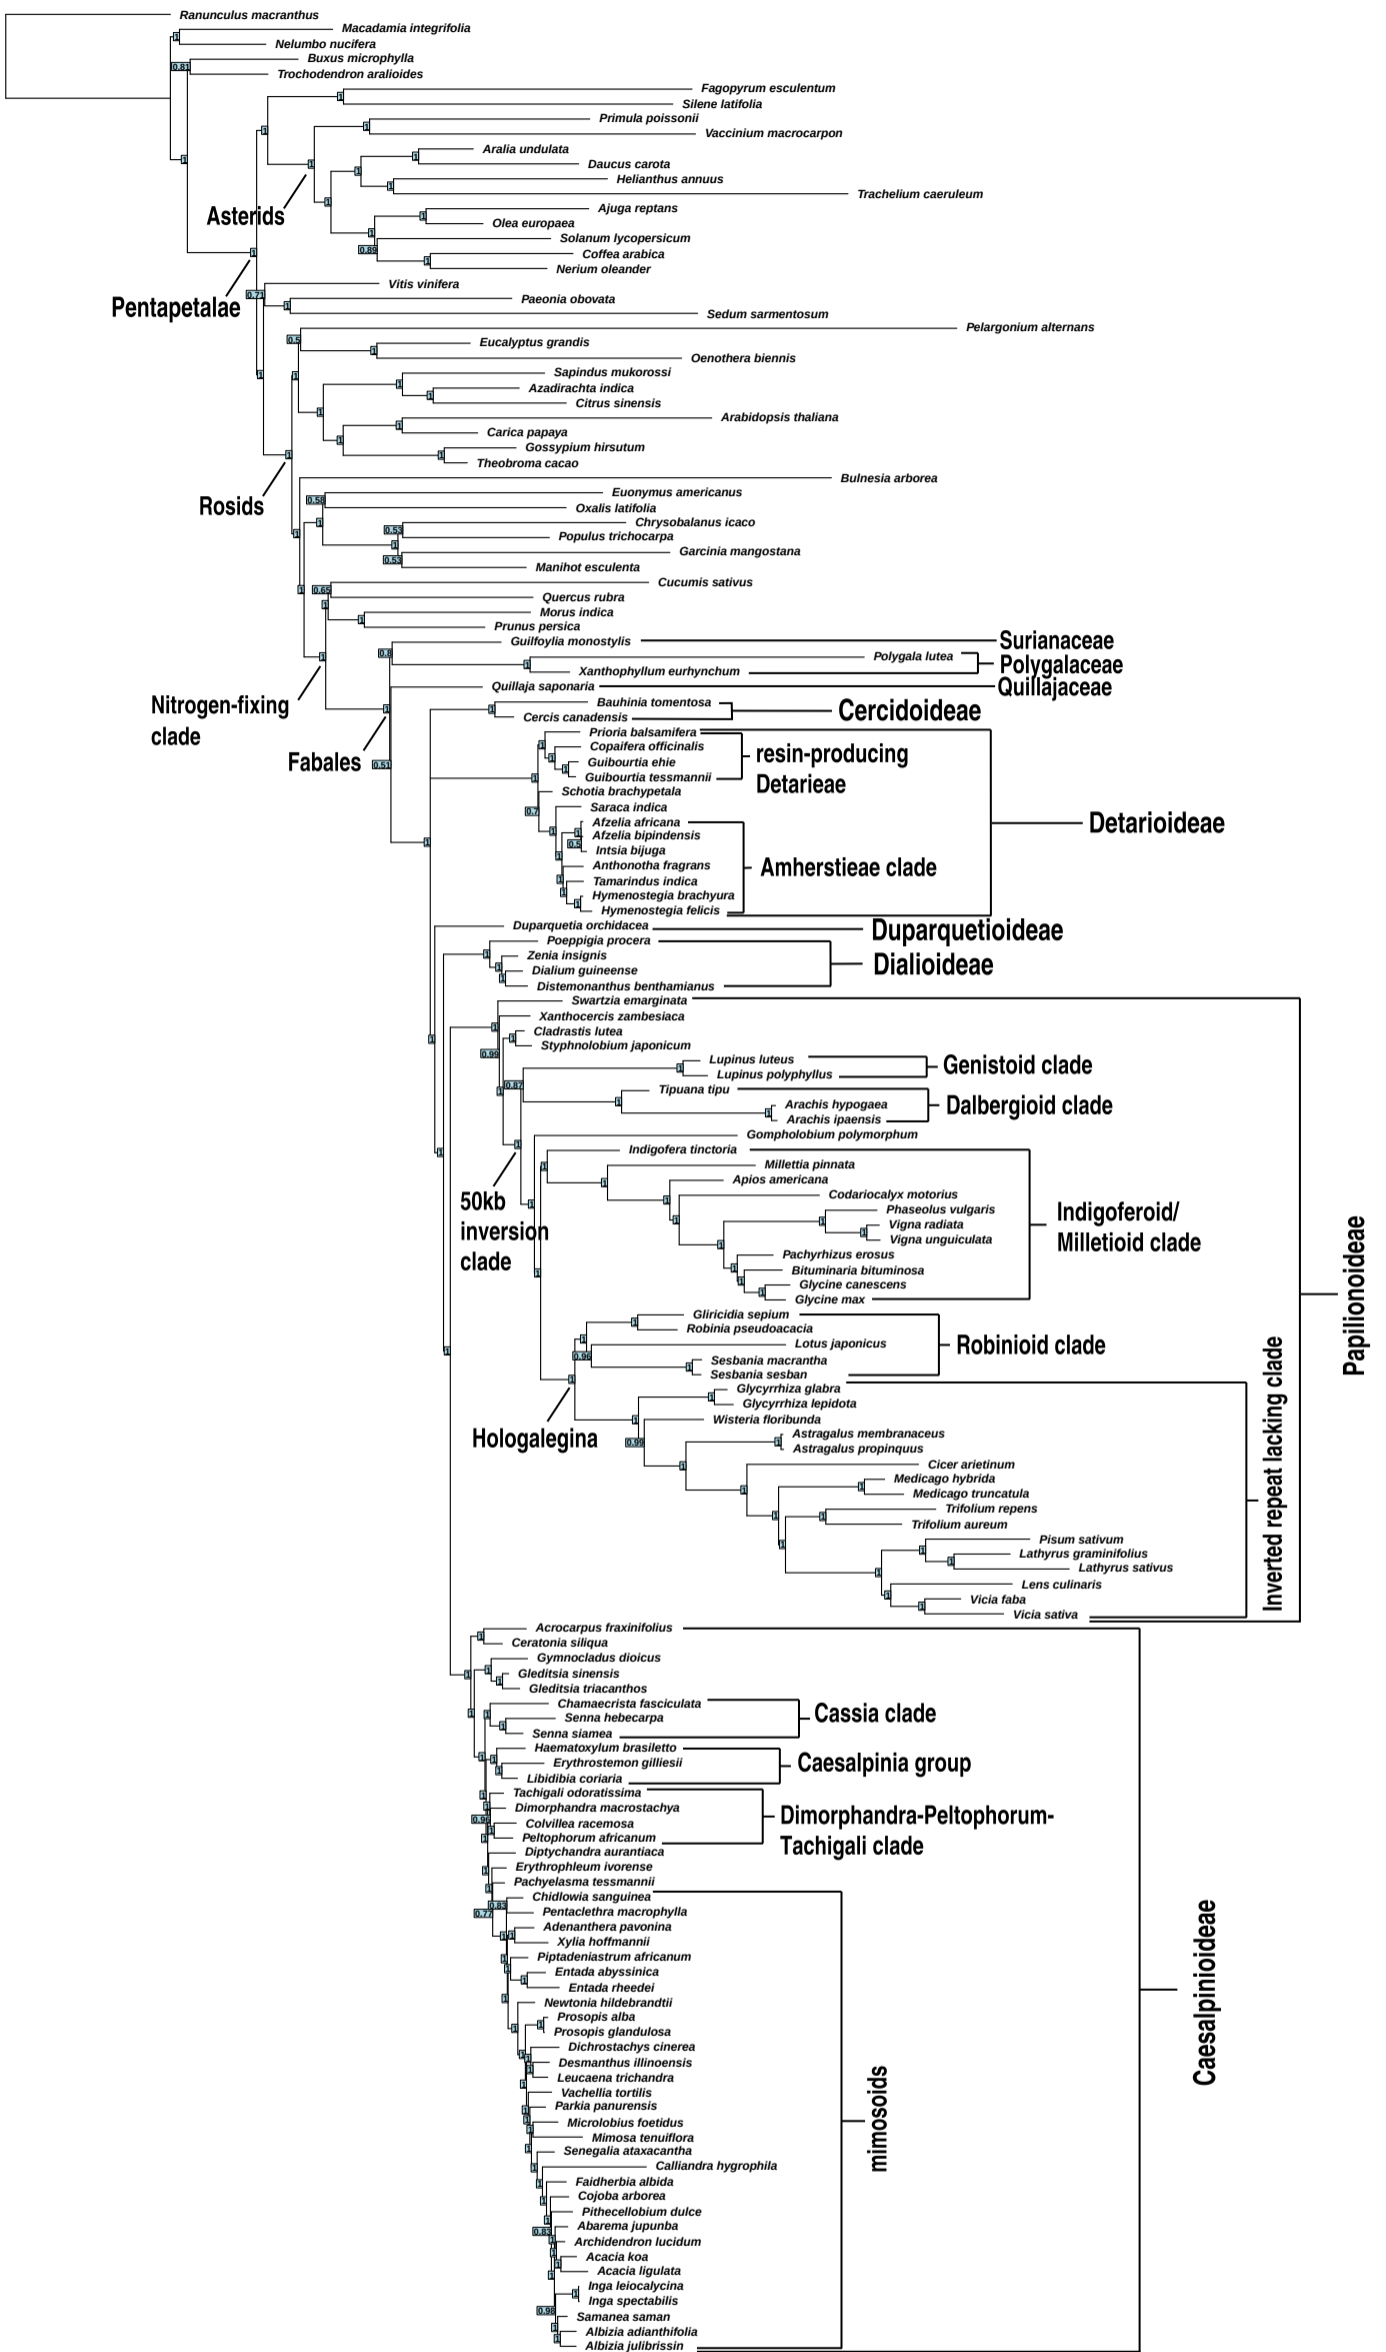

**Figure S4.** Bayesian majority-rule consensus tree inferred with Phylobayes from nucleotide alignment of chloroplast genes under the CATGTR model. Numbers on nodes indicate the posterior probabilities (pp) from 9000 post-burn-in MCMC cycles.

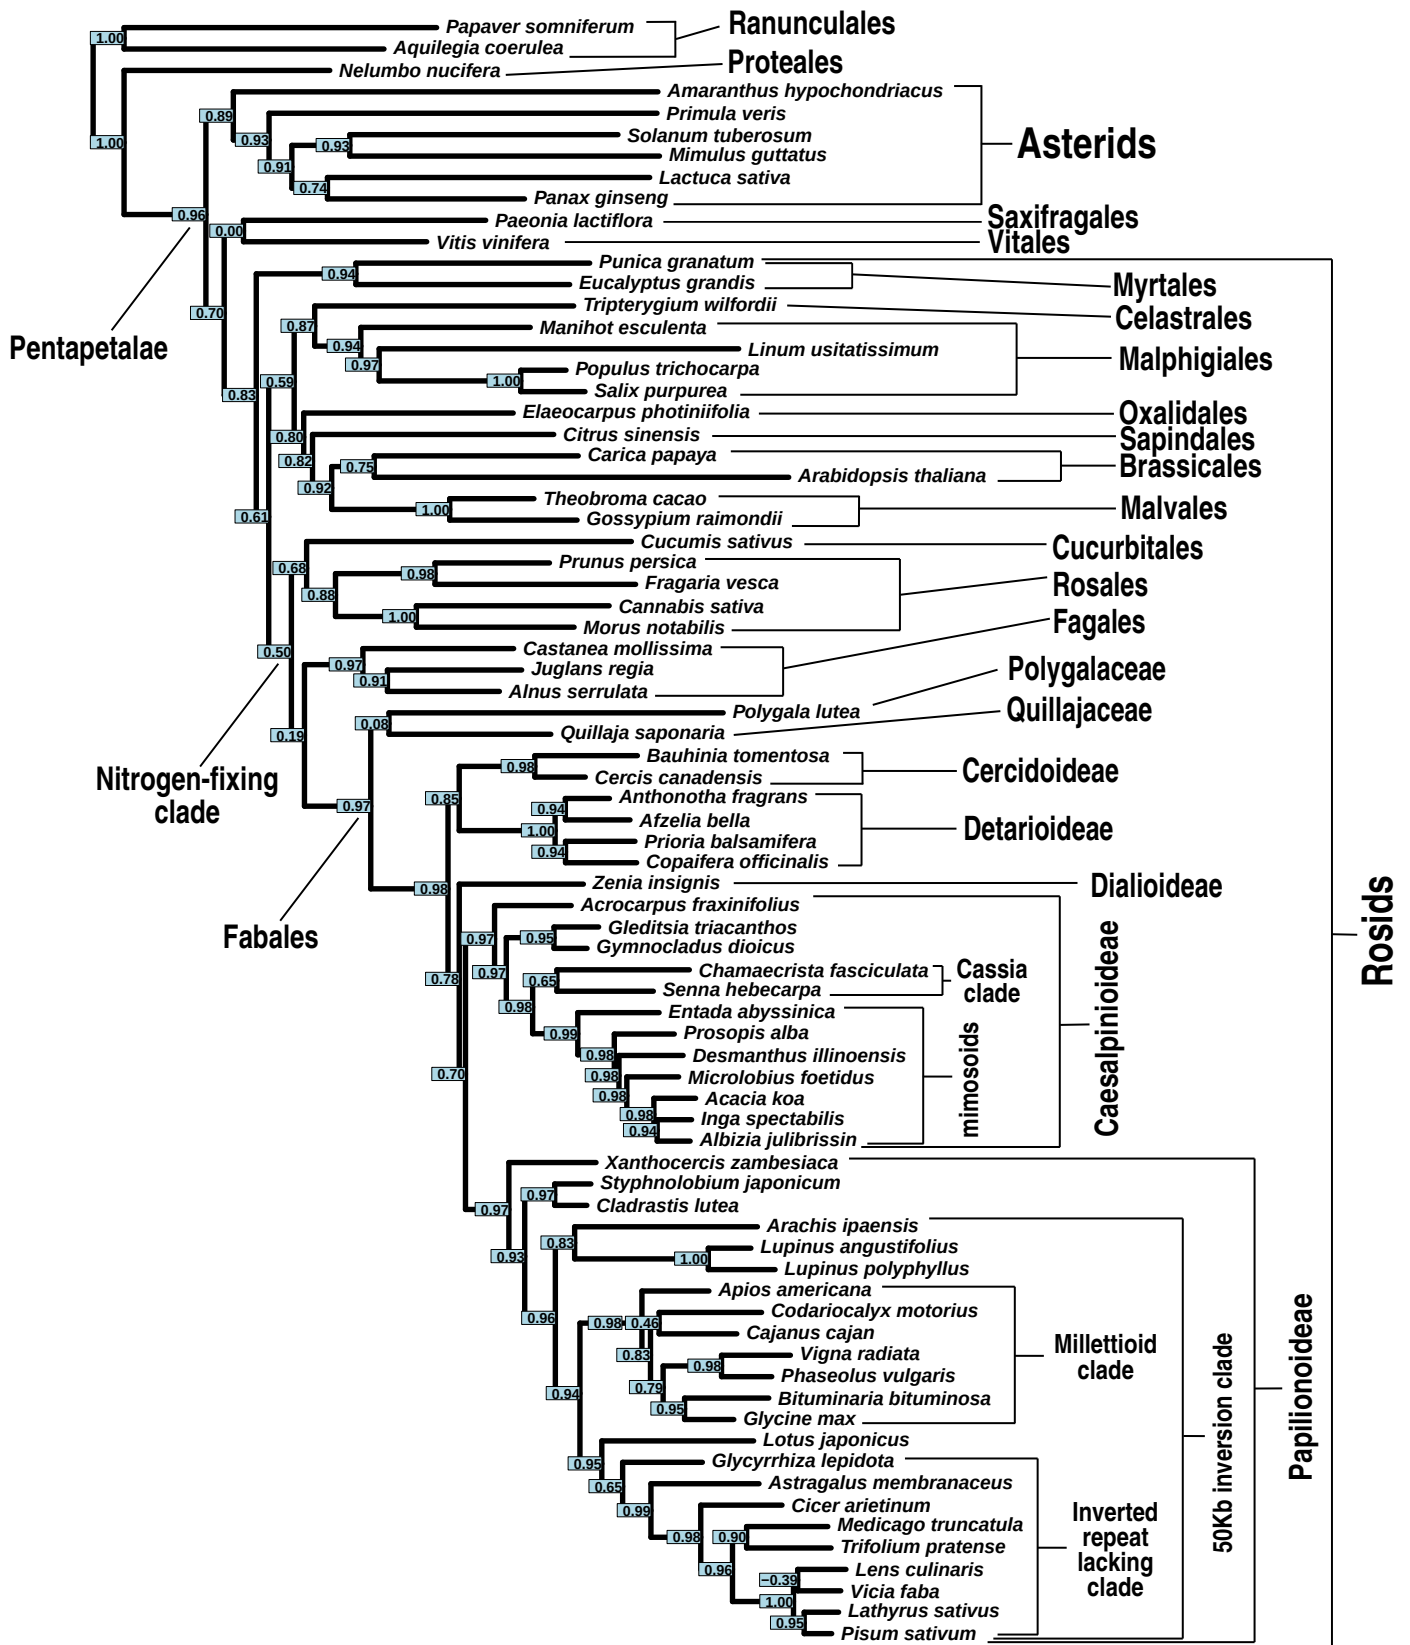

Figure S5. ML topology as inferred by RAxML from a concatenated alignment of 1,103 nuclear genes, under the LG4X model. Numbers on nodes indicate Internode Certainty All (ICA) values, as estimated from gene trees of the same 1,103 genes.

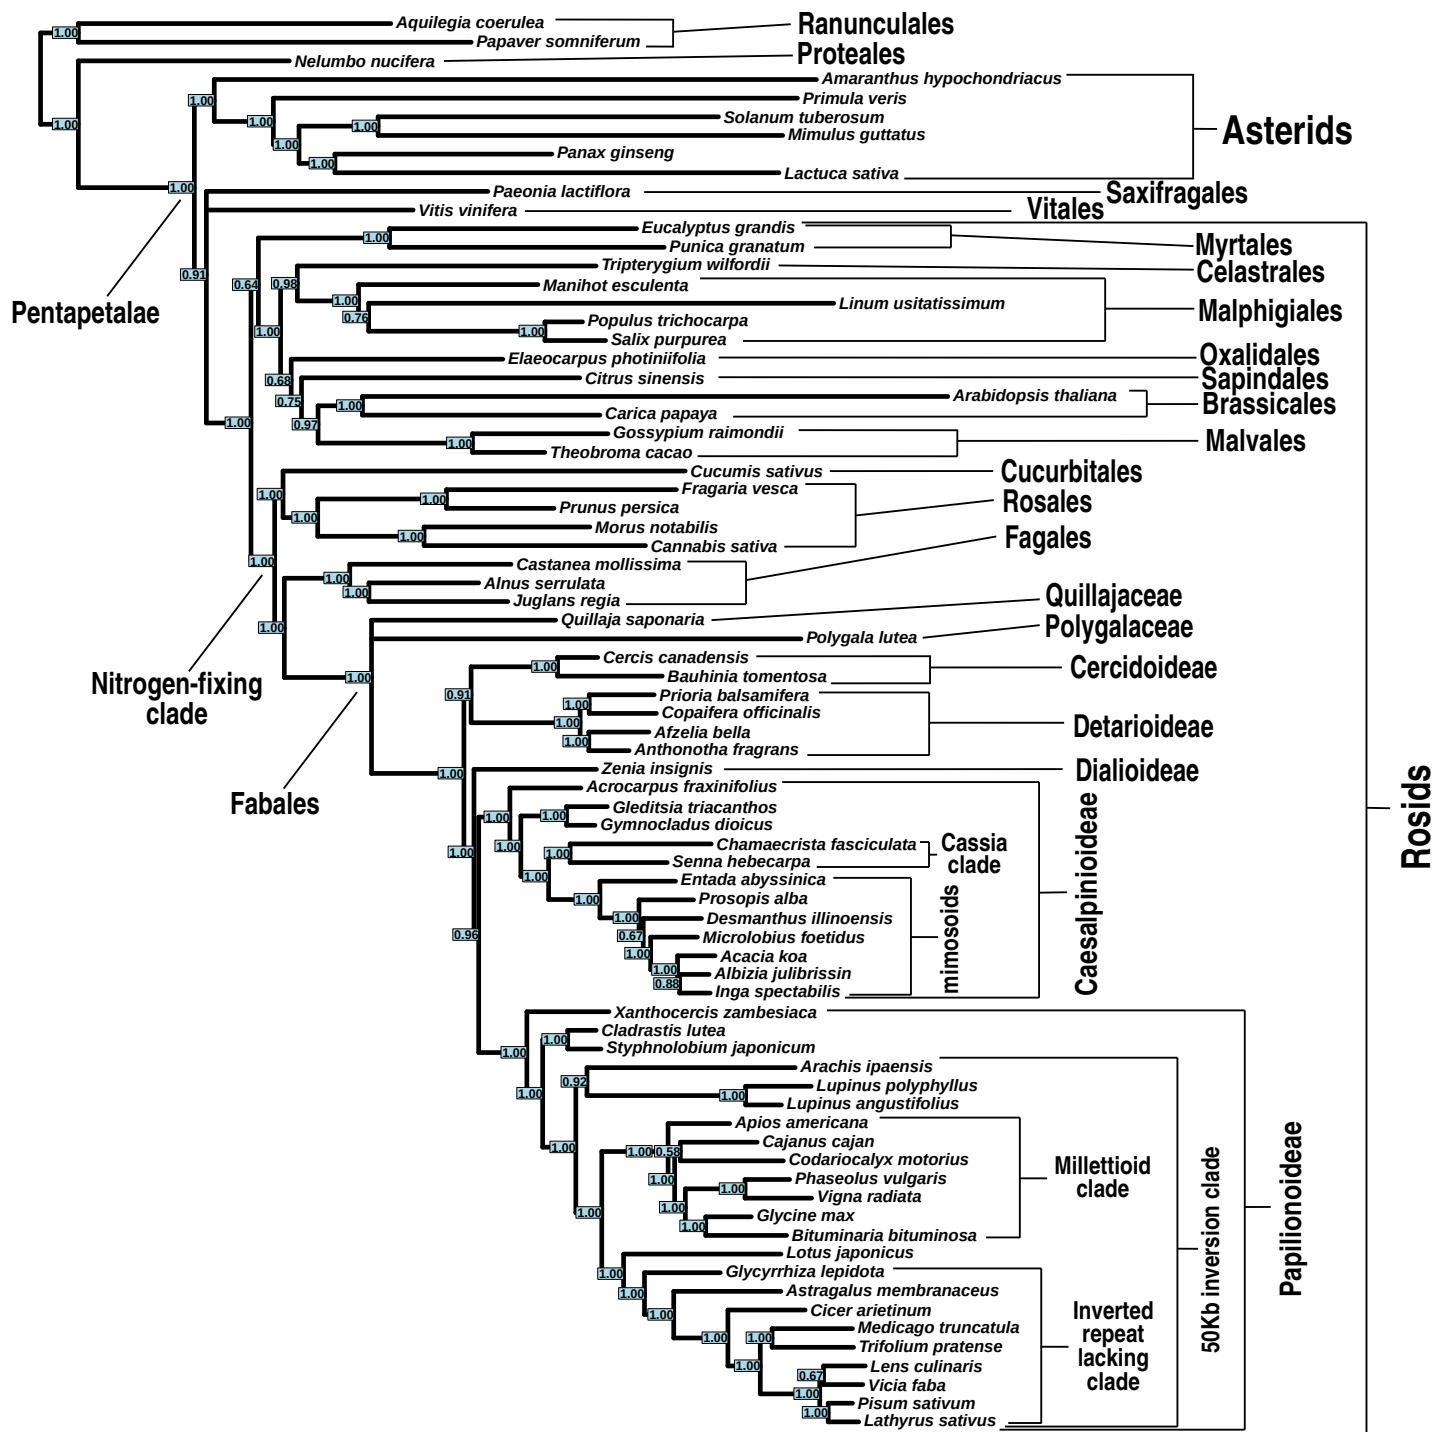

Figure S6. Bayesian gene jackknifing majority-rule consensus tree inferred with Phylobayes from a concatenated alignment of 1,103 nuclear genes. Numbers on nodes indicate posterior probabilities (pp), averaged over 500 posterior trees each, for 25 replicates (12,500 posterior trees in total).



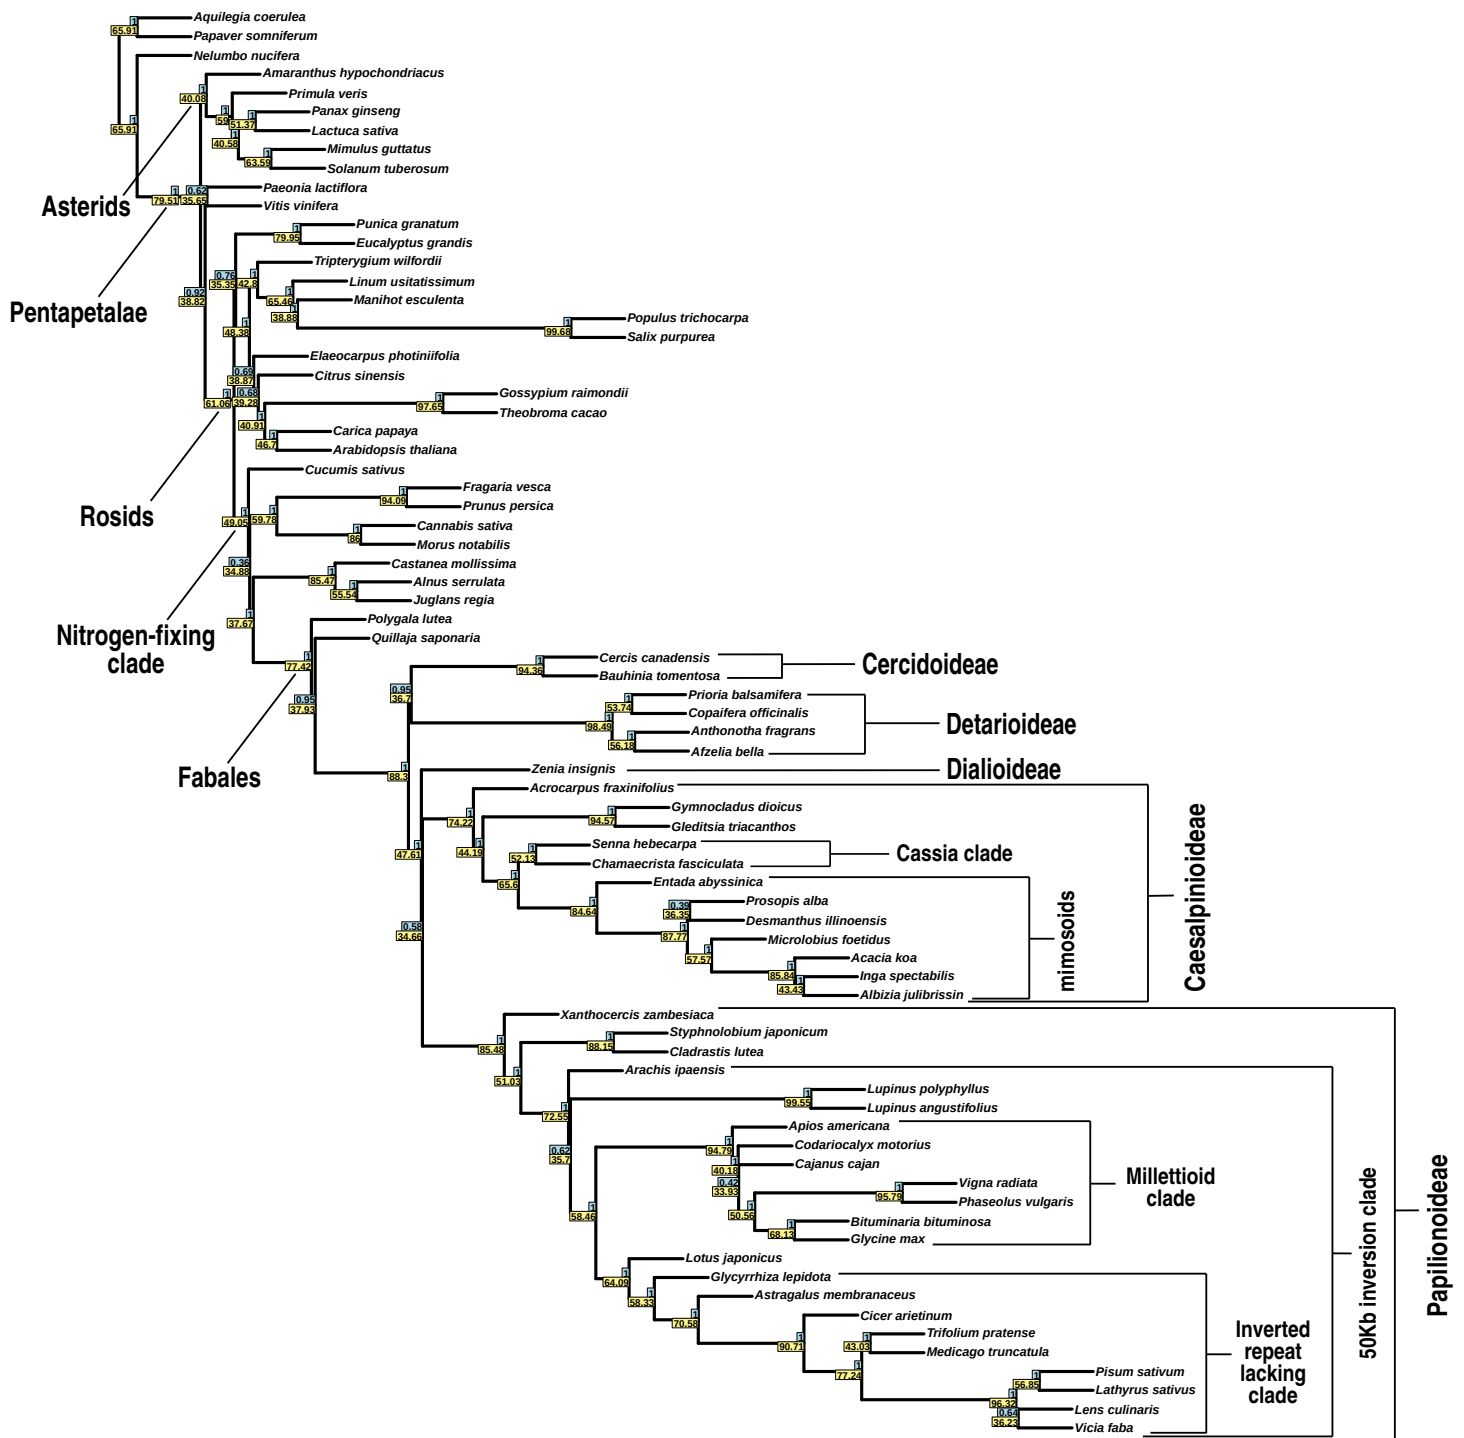

**Figure S7. Phylogeny estimated under the multi-species coalescent with ASTRAL.** Support values indicated represent local posterior probability (blue rectangles) and quartet support (yellow rectangles).
